# Supplementary material for: Differential gene expression during early development in recently evolved and sympatric Arctic charr morphs
Source: PeerJ. 2018 Feb 7;6:e4345. doi: 10.7717/peerj.4345 (PMC5807978; doi:10.7717/peerj.4345)
Supplement: Table S3 — GO.ID: Identification number for Gene Ontology categories Term: The Gene Ontology term or description of the category numDE.t: Number of transcripts within expression cluster in each GO-category numIn.t: Total number of transcripts in each GO-category fdr.t: Multiple testing corrected P-value (FDR) for enrichment based on transcripts p.t: Uncorrected P-value for enrichment based on transcripts numDE.g: Number of genes (SalmoBase) within expression cluster in each GO-category numIn.g: Total number of genes (SalmoBase) in each GO-category fdr.g: Multiple testing corrected P-value (FDR) for enrichment based on genes p.g: Uncorrected P-value for enrichment based on genes Cluster: Expression cluster GOclust: Super-GO-categories based on categories semantic similarity (see Methods) [file peerj-06-4345-s003.csv]

GO.ID	Term	numDE.t	numIn.t	fdr.t	p.t	numDE.g	numIn.g	fdr.g	p.g	Cluster	GOclust
GO:0097360	chorionic trophoblast cell proliferation	5	58	0.0005979462	6.45221315847016E-07	4	9	0.0014081711	1.09584005488805E-06	D	D01
GO:0061450	trophoblast cell migration	5	60	0.0005979462	7.69557504337287E-07	4	10	0.0014081711	1.81231800442521E-06	D	D01
GO:0040010	positive regulation of growth rate	60	1863	2.78653944415539E-20	1.79313992545392E-23	59	468	1.73454805887878E-17	1.11618279207128E-20	F	F01
GO:0040009	regulation of growth rate	60	1887	2.91681805869087E-20	3.75394859548375E-23	59	478	2.47841707945555E-17	3.18972597098526E-20	F	F01
GO:0045927	positive regulation of growth	81	5350	1.52786397456046E-09	2.06468104670332E-11	77	1305	0.000001016	1.37292623108774E-08	F	F01
GO:0040008	regulation of growth	113	10765	0.0001090759	3.64989979027009E-06	114	2634	0.0014323026	0.000044241	F	F01
GO:0019080	viral gene expression	47	1381	5.58666366350339E-19	1.07850649874583E-21	49	349	1.28927967284962E-16	2.48895689739308E-19	F	F02
GO:0016032	viral process	100	5391	1.68276056408786E-18	4.33143002339216E-21	96	1322	3.03161458300148E-13	9.75422967503694E-16	F	F02
GO:0044403	symbiosis, encompassing mutualism through parasitism	101	5751	4.24849485751217E-17	1.36695458735913E-19	97	1436	1.57886781225558E-11	6.0960147191335E-14	F	F02
GO:0006413	translational initiation	41	1277	7.79784752840523E-16	3.16678007285515E-18	46	337	3.85591770090708E-15	9.92514208727691E-18	F	F03
GO:1901564	organonitrogen compound metabolic process	188	14858	7.79784752840523E-16	3.51254393171407E-18	196	4212	1.0726399627409E-08	6.90244506268278E-11	F	F03
GO:0034641	cellular nitrogen compound metabolic process	409	44188	4.29780455579164E-13	2.21251199783353E-15	425	11579	7.31429280941947E-07	9.41350425922712E-09	F	F03
GO:0044260	cellular macromolecule metabolic process	489	55887	5.14353533108967E-12	3.64085512496695E-14	505	14414	3.01814660476112E-06	4.46701234938905E-08	F	F03
GO:1901575	organic substance catabolic process	158	13020	2.8523423194855E-11	2.38612935349495E-13	168	3493	2.6851483968388E-08	2.214767123488E-10	F	F03
GO:0043170	macromolecule metabolic process	507	59179	4.06901957130881E-11	3.9276250688309E-13	523	15366	9.17168110048947E-05	1.94765428774873E-06	F	F03
GO:0044248	cellular catabolic process	151	12451	9.01415441924753E-11	1.04411055049199E-12	157	3296	2.03133436055532E-07	2.09146394909171E-09	F	F03
GO:0006139	nucleobase-containing compound metabolic process	358	39987	4.73067924306841E-09	7.00164881535221E-11	373	10355	0.0001266246	2.93338750779048E-06	F	F03
GO:0046483	heterocycle metabolic process	364	41174	1.42683292825631E-08	2.2954197687521E-10	379	10675	0.0004178297	1.07549473589858E-05	F	F03
GO:0019538	protein metabolic process	356	39601	1.81733852204956E-08	3.04059212183324E-10	366	10097	9.61023706960023E-05	2.10262587108371E-06	F	F03
GO:0006725	cellular aromatic compound metabolic process	364	41299	2.03708120651929E-08	3.53933028159722E-10	380	10748	0.0005818469	0.0000161	F	F03
GO:1901360	organic cyclic compound metabolic process	369	42303	5.60969791465694E-08	0.000000001	386	11076	0.0017675294	5.64504415532073E-05	F	F03
GO:0042026	protein refolding	10	161	2.58489699586683E-06	5.40706714783031E-08	9	46	0.0003220743	7.87569085094604E-06	F	F03
GO:0061077	chaperone-mediated protein folding	14	347	2.58489699586683E-06	5.48916350473651E-08	14	96	5.84375331825218E-05	1.09053311601875E-06	F	F03
GO:1901576	organic substance biosynthetic process	357	42311	5.88948530347766E-06	1.53434632728367E-07	380	10947	0.0030712412	0.0001047463	F	F03
GO:0048806	genitalia development	53	2338	4.8948879901019E-12	2.83946505104271E-14	52	583	7.56720487291047E-10	3.40865084365336E-12	F	F04
GO:0009791	post-embryonic development	121	8705	8.06668893876873E-12	6.22910342762065E-14	117	2084	6.10208041716882E-09	3.14135414011265E-11	F	F04
GO:0008340	determination of adult lifespan	29	1346	2.87831580069115E-06	0.000000063	25	328	0.0008034012	2.32645143660495E-05	F	F04
GO:0009793	embryo development ending in seed dormancy	14	467	0.0001221418	4.24430928426288E-06	13	106	0.000645816	1.82856527908499E-05	F	F04
GO:0048316	seed development	14	510	0.0003351749	1.29411151516013E-05	13	118	0.0017675294	5.74690747245194E-05	F	F04
GO:0048367	shoot system development	17	920	0.0048587641	0.0002188632	16	196	0.0084363372	0.0003094409	F	F04
GO:0010171	body morphogenesis	29	2118	0.0078396192	0.0003834048	31	503	0.0043447605	0.0001509762	F	F04
GO:0007093	mitotic cell cycle checkpoint	45	1768	4.8948879901019E-12	3.14986357149414E-14	42	461	2.6851483968388E-08	2.24626313763864E-10	F	F05
GO:0031570	DNA integrity checkpoint	44	1800	3.74205425316928E-11	3.37122004790025E-13	44	475	8.35482281173546E-09	4.83870047011706E-11	F	F05
GO:0072395	signal transduction involved in cell cycle checkpoint	22	464	6.29386903457879E-11	6.48017403817636E-13	21	155	7.31429280941947E-07	9.11875302370091E-09	F	F05
GO:0000075	cell cycle checkpoint	53	2574	8.08248019187605E-11	8.84183804774085E-13	51	670	1.66702726066509E-07	1.56588035518896E-09	F	F05
GO:0051231	spindle elongation	19	460	7.8268071022251E-09	1.20877329764094E-10	19	115	1.66702726066509E-07	1.60909967245665E-09	F	F05
GO:0010948	negative regulation of cell cycle process	44	2425	1.50121916532317E-07	2.80150294687078E-09	41	608	7.77233848321473E-05	1.55046649279058E-06	F	F05
GO:0010564	regulation of cell cycle process	76	5919	3.48907396887912E-06	8.0827968391022E-08	77	1488	0.0001120467	2.52357500793299E-06	F	F05
GO:0007051	spindle organization	40	2381	6.52545840897441E-06	1.76363740783092E-07	39	536	2.38925547398089E-05	4.30496481798359E-07	F	F05
GO:0007050	cell cycle arrest	39	2267	8.75863599587057E-06	0.000000248	37	591	0.0008684163	0.000025706	F	F05
GO:0022402	cell cycle process	150	15127	3.07203557899289E-05	9.29122729811233E-07	155	3604	9.17168110048947E-05	1.89689241306099E-06	F	F05
GO:0044770	cell cycle phase transition	66	5409	6.65802896470475E-05	2.14222296161671E-06	65	1323	0.0022578087	7.55508711324649E-05	F	F05
GO:0007049	cell cycle	178	19194	0.0002154117	7.90120192422628E-06	185	4583	0.0003498573	8.78020291727883E-06	F	F05
GO:1903047	mitotic cell cycle process	100	9684	0.0003587363	1.40816696745523E-05	103	2264	0.0005552318	1.50062657655456E-05	F	F05
GO:0022613	ribonucleoprotein complex biogenesis	48	2326	1.92469394393893E-10	2.35322940378634E-12	48	567	2.03157269117211E-08	1.43805016749635E-10	F	F06
GO:0043933	macromolecular complex subunit organization	227	24414	3.1300736774226E-06	7.04971548969055E-08	237	5887	1.70279075850437E-05	2.73936737211127E-07	F	F06
GO:0022411	cellular component disassembly	66	5085	3.73326274516996E-06	9.12895651972063E-08	71	1168	0.00000114	1.61390111497154E-08	F	F06
GO:0061024	membrane organization	111	10284	1.16824269578415E-05	3.38294216925912E-07	120	2471	5.92623719239829E-06	9.15248987242979E-08	F	F06
GO:0044802	single-organism membrane organization	87	8341	0.0010555096	4.41493723833766E-05	91	1975	0.0010323105	3.12217452765893E-05	F	F06
GO:0046907	intracellular transport	185	16742	3.02929468641018E-10	3.89870616011606E-12	189	4208	2.75811300004742E-07	3.19472548268041E-09	F	F07
GO:0070727	cellular macromolecule localization	161	14172	2.36136139991552E-09	3.34298267684307E-11	162	3438	2.12683172253506E-07	2.32664988951712E-09	F	F07
GO:1902580	single-organism cellular localization	135	12793	5.88948530347766E-06	1.50893445598786E-07	136	3041	6.41113787709546E-05	1.23767140484468E-06	F	F07
GO:0045184	establishment of protein localization	160	16223	1.20343773141117E-05	3.56229959104979E-07	165	4133	0.0017675294	5.80077208262381E-05	F	F07
GO:0008104	protein localization	195	20973	0.0001093024	3.72781572928018E-06	198	5247	0.0063835128	0.0002300365	F	F07
GO:0048002	antigen processing and presentation of peptide antigen	34	1616	1.7078104186058E-07	3.29693131004981E-09	33	408	1.91413039408292E-05	3.20253476487489E-07	F	F08
GO:0019884	antigen processing and presentation of exogenous antigen	29	1400	3.71057987730846E-06	8.83471399359158E-08	28	359	0.0002090886	4.97829983292501E-06	F	F08
GO:0035966	response to topologically incorrect protein	33	1600	7.65757055164808E-07	1.52757198906751E-08	27	423	0.0063835128	0.0002268898	F	F09
GO:0018991	oviposition	19	751	5.57581540371418E-05	1.75813999216213E-06	20	176	2.24081179107806E-05	3.89330233971092E-07	F	F10
GO:0022613	ribonucleoprotein complex biogenesis	69	2326	2.54373286197123E-28	1.63689373357222E-31	69	567	6.31571340026132E-28	4.0641656372338E-31	G	G01
GO:0034641	cellular nitrogen compound metabolic process	344	44188	1.07551012769788E-14	1.50894467809186E-17	358	11579	4.59696536689598E-16	1.18326006869909E-18	G	G02
GO:0006139	nucleobase-containing compound metabolic process	319	39987	1.07551012769788E-14	2.65017767251215E-17	332	10355	2.953887428916E-16	4.92139358577659E-19	G	G02
GO:0046483	heterocycle metabolic process	326	41174	1.07551012769788E-14	2.76836583706019E-17	339	10675	2.953887428916E-16	5.70248538400772E-19	G	G02
GO:0006725	cellular aromatic compound metabolic process	324	41299	5.301232039087E-14	1.70567311424936E-16	337	10748	2.34503893676928E-15	9.05420438907059E-18	G	G02
GO:0006520	cellular amino acid metabolic process	38	2628	4.68291028797024E-06	6.93094830265865E-08	38	808	0.0005510549	1.24111470521893E-05	G	G02
GO:0032201	telomere maintenance via semi-conservative replication	6	72	8.50568176980467E-05	0.000001642	6	26	0.0007608585	1.81156793866022E-05	G	G02
GO:0006413	translational initiation	19	1277	0.0004253523	1.040115057636E-05	19	337	0.0061004897	0.0002080605	G	G02
GO:0044786	cell cycle DNA replication	11	415	0.0010608556	2.86717739630257E-05	12	130	0.001325644	3.32690582078121E-05	G	G02
GO:0044249	cellular biosynthetic process	276	41892	0.0016056676	4.44296710890331E-05	285	10844	0.0024048958	6.34496329078621E-05	G	G02
GO:1901360	organic cyclic compound metabolic process	328	42303	1.63906973604709E-13	6.32845457933241E-16	343	11076	5.26300808355406E-15	2.37072436196129E-17	G	G03
GO:0044260	cellular macromolecule metabolic process	382	55887	2.97285802480972E-08	3.25216128840189E-10	397	14414	3.93309503373429E-10	3.03713902218864E-12	G	G03
GO:0043170	macromolecule metabolic process	396	59179	1.67763593628986E-07	2.15911960912466E-09	410	15366	1.72594151166627E-08	1.66596671010257E-10	G	G03
GO:1901576	organic substance biosynthetic process	281	42311	0.0006706804	1.76949135030698E-05	290	10947	0.0009865628	2.41244448679758E-05	G	G03
GO:1903047	mitotic cell cycle process	113	9684	5.75081690428973E-13	2.59045806499537E-15	114	2264	7.92215029985667E-15	4.07832705269327E-17	G	G04
GO:0007049	cell cycle	182	19194	7.80185596570698E-13	4.01639946754542E-15	185	4583	2.14225619801495E-15	6.89271620982931E-18	G	G04
GO:0022402	cell cycle process	153	15127	1.21308256095518E-12	7.0255746773466E-15	154	3604	1.77883572920199E-14	1.03021374278107E-16	G	G04
GO:0044770	cell cycle phase transition	73	5409	4.83958279917997E-11	3.11427464554695E-13	76	1323	3.34627476965978E-12	2.36866296436664E-14	G	G04
GO:0007051	spindle organization	44	2381	2.12606028840869E-10	1.50493328008337E-12	45	536	3.34627476965978E-12	2.18685059389138E-14	G	G04
GO:0007093	mitotic cell cycle checkpoint	36	1768	1.108157200665E-09	8.55719846073362E-12	38	461	5.15624337849552E-10	4.31345971174014E-12	G	G04
GO:0000075	cell cycle checkpoint	44	2574	0.000000002	1.70536202756597E-11	46	670	1.52654929252332E-09	1.37526963290389E-11	G	G04
GO:0031570	DNA integrity checkpoint	35	1800	8.52585489571261E-09	7.68095035649785E-11	35	475	5.95175890043752E-08	6.51093316006679E-10	G	G04
GO:0072395	signal transduction involved in cell cycle checkpoint	17	464	3.33031141751103E-08	3.85750357240659E-10	18	155	7.94167172968284E-07	1.12430359107479E-08	G	G04
GO:0010948	negative regulation of cell cycle process	39	2425	0.000000091	1.11218100474159E-09	41	608	0.000000031	3.1882969963829E-10	G	G04
GO:0007059	chromosome segregation	36	2311	2.18857224623056E-06	0.000000031	36	552	7.00390241413965E-07	9.46473299208061E-09	G	G04
GO:0010564	regulation of cell cycle process	64	5919	7.00782374895218E-06	1.08228938207756E-07	69	1488	3.91122327189904E-07	0.000000005	G	G04
GO:0051304	chromosome separation	15	563	3.53719249917399E-05	5.91808268845069E-07	16	136	3.94453185553203E-06	6.09194108962476E-08	G	G04
GO:0007050	cell cycle arrest	31	2267	0.0001882661	4.11907727153804E-06	32	591	0.0001868038	3.72645956916676E-06	G	G04
GO:0098813	nuclear chromosome segregation	24	1540	0.0003482591	8.29188429498306E-06	25	370	5.00720775755783E-05	9.34421010097664E-07	G	G04
GO:0090068	positive regulation of cell cycle process	31	2413	0.0006125171	1.53720514587282E-05	33	662	0.0006324052	1.46503130765647E-05	G	G04
GO:0040010	positive regulation of growth rate	35	1863	1.28616727043844E-08	1.24147419926491E-10	34	468	1.42680624309924E-07	1.65267132405318E-09	G	G05
GO:0040009	regulation of growth rate	35	1887	1.78400907263126E-08	1.83681757799873E-10	34	478	2.31827433983444E-07	2.83444095603953E-09	G	G05
GO:0071166	ribonucleoprotein complex localization	19	763	1.86651821672394E-06	2.52232191449181E-08	15	165	0.0002089562	4.30282994812718E-06	G	G06
GO:0006403	RNA localization	30	2007	4.16143731184968E-05	7.498085246576E-07	26	439	0.0003007289	6.38613550792897E-06	G	G06
GO:0051236	establishment of RNA localization	22	1472	0.0006584931	1.6949629574217E-05	19	317	0.003124091	9.44866643376796E-05	G	G06
GO:0044403	symbiosis, encompassing mutualism through parasitism	59	5751	1.54388088806795E-05	2.48372086240018E-07	63	1436	0.000010997	0.000000184	G	G07
GO:0016032	viral process	55	5391	0.000052973	9.88556889680042E-07	59	1322	1.52614726705827E-05	2.65160722075761E-07	G	G07
GO:0009791	post-embryonic development	82	8705	4.16143731184968E-05	7.31164910939282E-07	85	2084	1.90024871703798E-06	2.81246592611799E-08	G	G08
GO:0048367	shoot system development	18	920	0.0001650018	3.50389816917069E-06	19	196	5.25912374857685E-06	8.4606237911468E-08	G	G08
GO:0009560	embryo sac egg cell differentiation	3	13	0.00211706	5.99424965066849E-05	3	5	0.0033822427	0.0001044708	G	G08
GO:0044702	single organism reproductive process	123	16212	0.003553091	0.0001051752	122	3972	0.0027035519	7.65484444185916E-05	G	G08
GO:0010171	body morphogenesis	25	2118	0.0092968935	0.0002931453	26	503	0.002411345	6.51714877014826E-05	G	G08
GO:0048002	antigen processing and presentation of peptide antigen	25	1616	0.000093184	1.85888198445372E-06	27	408	2.87041517052414E-05	5.17191922616962E-07	G	G09
GO:0019884	antigen processing and presentation of exogenous antigen	22	1400	0.0002679732	6.13637819598254E-06	24	359	0.000096062	1.85447793801839E-06	G	G09
GO:0035966	response to topologically incorrect protein	25	1600	0.000095805	1.97281765933667E-06	23	423	0.002778198	8.04497481774432E-05	G	G10
GO:0010876	lipid localization	46	3117	3.6170375586234E-10	5.30586916910374E-13	37	806	1.36150345044395E-07	1.75225669297806E-10	I	I01
GO:0019915	lipid storage	19	1160	0.0001219435	7.84707154588362E-07	16	285	0.0004084392	0.000002469	I	I01
GO:0044765	single-organism transport	175	31398	0.0017017705	1.75214461126442E-05	156	8306	0.0003544734	1.82483107340049E-06	I	I01
GO:0044281	small molecule metabolic process	130	16514	3.6170375586234E-10	6.30334213876979E-13	111	4755	1.10148256267092E-06	2.83521895153389E-09	I	I02
GO:0006629	lipid metabolic process	93	10026	3.6170375586234E-10	6.98269798962047E-13	80	2749	8.91318035137921E-08	5.73563729174981E-11	I	I02
GO:0044255	cellular lipid metabolic process	74	7995	7.95418969177491E-08	2.55926309259167E-10	64	2161	1.19757874000133E-06	3.85321344916773E-09	I	I02
GO:0044712	single-organism catabolic process	58	6797	3.38371315999183E-05	1.74193727670107E-07	52	1875	0.0002350789	1.05891374648125E-06	I	I02
GO:0006082	organic acid metabolic process	60	7596	0.0003139604	2.42440428920971E-06	53	2250	0.0073685085	8.06078789619326E-05	I	I02
GO:0071827	plasma lipoprotein particle organization	14	240	0.000000002	5.09561545202663E-12	10	62	3.18579706204547E-06	1.23003747569323E-08	I	I03
GO:0097006	regulation of plasma lipoprotein particle levels	15	519	2.59835929624451E-06	0.00000001	11	134	0.0004084392	2.62830887892885E-06	I	I04
GO:0042592	homeostatic process	98	13220	2.705767991804E-06	1.21881441072252E-08	90	3518	1.10148256267092E-06	2.16886652794937E-09	I	I04
GO:0019725	cellular homeostasis	49	6290	0.0028691174	3.13867410448306E-05	43	1721	0.0098937077	0.0001145989	I	I04
GO:1990267	response to transition metal nanoparticle	20	1209	3.39525592208817E-05	1.9663644336418E-07	17	336	0.0006300995	4.86563350711843E-06	I	I05
GO:0010035	response to inorganic substance	47	5613	0.0007094837	5.93519208965066E-06	44	1551	0.0006300995	4.4644201186116E-06	I	I05
GO:0010033	response to organic substance	151	26896	0.0050199677	5.81463437600705E-05	132	7104	0.0039281746	4.04445260890148E-05	I	I05
GO:1901700	response to oxygen-containing compound	93	15160	0.0078795688	0.0001064807	88	4099	0.0010321031	8.63406708305534E-06	I	I05
GO:0010035	response to inorganic substance	82	5613	2.93375263449716E-14	2.47912019457188E-17	66	1551	0.000003612	9.29739631395444E-09	J	J01
GO:1990267	response to transition metal nanoparticle	29	1209	1.53750792067681E-09	7.63399878769512E-12	19	336	0.0039520533	6.35787202974668E-05	J	J01
GO:0009611	response to wounding	95	10441	2.52450333809026E-06	3.08658709290316E-08	86	2763	0.0024226325	3.42972432012639E-05	J	J01
GO:0031424	keratinization	15	130	2.93375263449716E-14	3.77574341634127E-17	8	39	0.0001345017	9.52071486599548E-07	J	J02
GO:0002027	regulation of heart rate	20	1525	0.006919717	0.0001603023	21	358	0.0013314631	1.54223523648549E-05	J	J02
GO:0006082	organic acid metabolic process	94	7596	2.74560766299067E-12	5.30040089380438E-15	89	2250	4.94604581819361E-07	6.36556733358251E-10	J	J03
GO:0044281	small molecule metabolic process	158	16514	3.47314041480265E-12	8.93987236757439E-15	154	4755	4.94604581819361E-07	3.46249337231524E-10	J	J03
GO:0006520	cellular amino acid metabolic process	47	2628	7.96797150645396E-11	2.56369739589896E-13	42	808	7.51670204826649E-06	0.000000029	J	J03
GO:0044711	single-organism biosynthetic process	114	11121	2.82892020288609E-10	1.0922471825815E-12	111	3169	1.96764226469923E-06	3.79853719053905E-09	J	J03
GO:0045103	intermediate filament-based process	20	552	1.53750792067681E-09	7.9150986907429E-12	13	125	0.0001933019	1.61706895449881E-06	J	J03
GO:0044712	single-organism catabolic process	76	6797	3.16699142105227E-08	2.03796101740815E-10	73	1875	1.05552542536098E-05	5.43385032360865E-08	J	J03
GO:0055114	oxidation-reduction process	64	5810	5.61108158789463E-07	5.77717538007169E-09	67	1733	4.1409663167572E-05	2.66471448954775E-07	J	J03
GO:0055086	nucleobase-containing small molecule metabolic process	49	4646	0.0001275962	1.88848965719318E-06	52	1360	0.000864239	8.89821332737815E-06	J	J03
GO:1901685	glutathione derivative metabolic process	5	84	0.0035370532	6.82828795764131E-05	6	31	0.0023794348	3.21545247329069E-05	J	J03
GO:0015980	energy derivation by oxidation of organic compounds	30	2775	0.0051372291	0.0001123975	33	799	0.005774332	0.0001003262	J	J03
GO:0006575	cellular modified amino acid metabolic process	28	1283	3.16699142105227E-08	1.93533183385012E-10	28	396	3.90089553424215E-06	1.2551143932568E-08	J	J04
GO:1901135	carbohydrate derivative metabolic process	85	8228	0.000000106	8.57700965591028E-10	79	2335	0.0004482943	4.03868695064863E-06	J	J04
GO:1901564	organonitrogen compound metabolic process	128	14858	0.000000106	8.86519759627305E-10	121	4212	0.0020984743	2.70073909725737E-05	J	J04
GO:0044723	single-organism carbohydrate metabolic process	66	5771	2.01489006667067E-07	1.81521627627988E-09	61	1592	0.0001685172	1.30129144779847E-06	J	J04
GO:1901657	glycosyl compound metabolic process	36	2361	4.20634138659638E-07	4.06017508358724E-09	37	674	1.05552542536098E-05	5.0915563080141E-08	J	J04
GO:0006091	generation of precursor metabolites and energy	46	3588	9.07683677705097E-07	9.92961552187043E-09	49	1054	1.12352564614818E-05	6.50690528657249E-08	J	J04
GO:0005975	carbohydrate metabolic process	71	6867	2.18318830641894E-06	2.5287895441146E-08	66	1888	0.0009145098	1.00042898720591E-05	J	J04
GO:0019637	organophosphate metabolic process	68	7506	0.0004302629	6.92186133781306E-06	73	2115	0.0005157002	4.97780116141513E-06	J	J04
GO:0051186	cofactor metabolic process	31	2912	0.006385004	0.0001438064	32	776	0.0072846792	0.0001312555	J	J04
GO:2000257	regulation of protein activation cascade	8	110	1.15075556877642E-05	1.5550750929411E-07	7	43	0.0018849759	2.30466813283478E-05	J	J05
GO:0006956	complement activation	9	157	0.000012175	1.72361822257097E-07	8	66	0.0036918569	5.50732643108829E-05	J	J05
GO:0045184	establishment of protein localization	189	16223	9.74806948062565E-13	6.27288898367159E-16	191	4133	2.83722554509147E-10	1.82575646402283E-13	K	K01
GO:0046907	intracellular transport	189	16742	4.26368648157937E-12	5.48736998916264E-15	192	4208	3.99474560980323E-10	5.14124274105949E-13	K	K01
GO:0044765	single-organism transport	296	31398	4.37411698593981E-10	1.12589883807975E-12	309	8306	1.78788102961616E-07	4.60201037224237E-10	K	K01
GO:0006810	transport	327	36351	5.57599459917071E-09	1.88263717036862E-11	340	9582	2.06267993882027E-06	9.291351075767E-09	K	K01
GO:0008104	protein localization	212	20973	5.57599459917071E-09	2.15289366763348E-11	212	5247	6.53395039771173E-07	2.10230064276439E-09	K	K01
GO:0051649	establishment of localization in cell	227	23652	4.2680136227433E-08	2.47182256143434E-10	235	6087	2.24646400447586E-06	1.156480825985E-08	K	K01
GO:0070727	cellular macromolecule localization	143	14172	4.54564717171083E-06	4.97271569620876E-08	143	3438	7.55411612716241E-05	4.37497073001684E-07	K	K01
GO:1902580	single-organism cellular localization	120	12793	0.0027804131	5.90435213942955E-05	120	3041	0.0044470794	5.15105721603573E-05	K	K01
GO:0055114	oxidation-reduction process	90	5810	9.0151722501268E-12	1.74038074326772E-14	91	1733	1.03449073945719E-06	0.000000004	K	K02
GO:1901564	organonitrogen compound metabolic process	157	14858	2.19484975914561E-08	1.12990978591795E-10	159	4212	0.0028766578	2.59158358921247E-05	K	K02
GO:0044281	small molecule metabolic process	171	16514	1.12849260039524E-07	7.39655628341688E-10	174	4755	0.0045063847	5.50973670963419E-05	K	K02
GO:0044712	single-organism catabolic process	88	6797	1.12849260039524E-07	7.98804285994055E-10	82	1875	0.003311288	3.40930548376403E-05	K	K02
GO:0022900	electron transport chain	18	610	3.62811741936897E-06	3.73551343049572E-08	18	218	0.0040457145	4.42581377442519E-05	K	K02
GO:1901685	glutathione derivative metabolic process	8	84	5.63978648504867E-06	6.53257121820309E-08	8	31	0.0002455984	1.58042723318791E-06	K	K02
GO:0061024	membrane organization	122	10284	8.50256325737825E-09	3.82998344926948E-11	126	2471	0.000000008	1.53947768026541E-11	K	K03
GO:0019725	cellular homeostasis	77	6290	7.64349417199804E-06	9.3453274947209E-08	77	1721	0.0029338699	2.8319207725869E-05	K	K03
GO:0044802	single-organism membrane organization	86	8341	0.0008397729	1.56714372969743E-05	88	1975	0.0011923152	8.43981161320997E-06	K	K03
GO:0040009	regulation of growth rate	36	1887	9.99495951306524E-07	7.71811545410443E-09	31	478	0.0018517465	1.42992008757887E-05	K	K04
GO:0040010	positive regulation of growth rate	35	1863	1.87775337188768E-06	1.69166970440332E-08	30	468	0.0028766578	2.43852668120644E-05	K	K04
GO:0044403	symbiosis, encompassing mutualism through parasitism	65	5751	0.0001265805	2.03636521223378E-06	65	1436	0.0065221712	8.8137449163771E-05	K	K05
GO:0007275	multicellular organismal development	386	55719	3.71619159502481E-12	2.39137168277015E-15	351	14166	3.10895488086494E-12	6.00184339935317E-15	L	L01
GO:0009653	anatomical structure morphogenesis	284	37101	9.65652632275134E-12	1.24279618053428E-14	257	9062	1.75907634295564E-12	1.54074364884174E-15	L	L01
GO:0048731	system development	354	50262	1.53136551456528E-11	2.95630408217236E-14	323	12765	1.84636979065821E-11	5.94070074214354E-14	L	L01
GO:0060322	head development	119	11068	2.2053100350888E-11	5.67647370679229E-14	100	2728	1.43771843454674E-08	8.32655464023208E-11	L	L01
GO:0048869	cellular developmental process	314	43485	5.68743555231679E-11	2.06546755333419E-13	286	10811	2.06746227675375E-11	7.98247983302608E-14	L	L01
GO:0007420	brain development	111	10418	1.52026152261945E-10	7.82631414475907E-13	95	2595	4.26223942891414E-08	3.01702919678607E-10	L	L01
GO:0048468	cell development	227	29618	1.0921780767521E-08	7.02817295207274E-11	208	7197	5.00200938073508E-10	2.25315737870949E-12	L	L01
GO:0032989	cellular component morphogenesis	173	21481	8.0082020270504E-08	5.6686114734591E-10	156	5096	1.89351463562967E-08	1.21847788650558E-10	L	L01
GO:0048513	organ development	268	38874	5.84348363662245E-07	5.64042822067804E-09	247	9859	2.19276055718059E-06	2.11656424438281E-08	L	L01
GO:0048598	embryonic morphogenesis	98	10981	5.58481677026199E-06	7.18766637099355E-08	88	2723	3.99450597163781E-05	4.88388761011057E-07	L	L01
GO:0001502	cartilage condensation	14	562	0.0001259973	2.10806210761033E-06	11	155	0.0058145493	0.0001983083	L	L01
GO:0021772	olfactory bulb development	17	805	0.0001885762	3.27642046978106E-06	14	207	0.0020395174	4.7247507279455E-05	L	L01
GO:0021988	olfactory lobe development	17	813	0.0002156903	4.02510933693955E-06	14	210	0.0022591414	5.52428411165485E-05	L	L01
GO:0060323	head morphogenesis	17	873	0.0002841465	0.000006034	13	207	0.0056987118	0.0001833562	L	L01
GO:0030900	forebrain development	58	6004	0.0003462307	8.02078953239928E-06	51	1496	0.0019423804	4.35546881544584E-05	L	L01
GO:0048588	developmental cell growth	33	2680	0.000411614	1.00652062733212E-05	27	601	0.0018863293	4.00571864381316E-05	L	L01
GO:0034505	tooth mineralization	8	201	0.0005960306	1.61089344217028E-05	6	51	0.0098282147	0.0004047656	L	L01
GO:0021537	telencephalon development	40	3832	0.0013410887	4.5738548000407E-05	36	957	0.0032607637	9.23253549104432E-05	L	L01
GO:0048646	anatomical structure formation involved in morphogenesis	121	16320	0.0014884848	5.45969319339396E-05	112	4001	0.0006409629	1.15488818746412E-05	L	L01
GO:0010171	body morphogenesis	25	2118	0.0025836762	0.000103248	22	503	0.0080774795	0.0002962782	L	L01
GO:0048839	inner ear development	33	3085	0.0034122675	0.0001467062	32	868	0.0085961799	0.0003214356	L	L01
GO:0001822	kidney development	40	4186	0.0054635511	0.0002531375	38	1102	0.0087877281	0.0003392945	L	L01
GO:0007423	sensory organ development	80	10439	0.0066483611	0.0003224079	74	2627	0.0098282147	0.0004015068	L	L01
GO:0016358	dendrite development	46	5049	0.0076641378	0.0003797546	45	1092	8.12055872939842E-05	1.14962864894958E-06	L	L01
GO:0061061	muscle structure development	78	10328	0.0097041934	0.0004933277	79	2486	0.0002326621	3.99937778990432E-06	L	L01
GO:0006928	movement of cell or subcellular component	189	21878	5.68743555231679E-11	2.19592106267057E-13	177	5366	1.75907634295564E-12	2.26393351731742E-15	L	L02
GO:0030030	cell projection organization	169	19211	1.06765981791737E-09	6.18335801882648E-12	155	4564	1.1924091062755E-11	3.06926410881725E-14	L	L02
GO:0048870	cell motility	135	15478	1.1687930139474E-07	9.0254286791305E-10	124	3890	2.70259343055686E-07	2.08694473402074E-09	L	L02
GO:0016477	cell migration	130	14881	1.98589045901467E-07	1.66129832478704E-09	118	3720	9.55310065977799E-07	0.000000008	L	L02
GO:0050808	synapse organization	50	4309	2.81987299184238E-05	4.35501620361757E-07	47	997	1.3974574848509E-06	1.25897070707289E-08	L	L02
GO:0038034	signal transduction in absence of ligand	18	917	9.25155000724531E-05	1.48834459576018E-06	13	224	0.0098282147	0.0003940519	L	L02
GO:0008037	cell recognition	30	2266	0.0002841465	6.02415860120409E-06	26	497	0.0002326621	4.04239185301258E-06	L	L02
GO:2000145	regulation of cell motility	68	7470	0.0003462307	8.01107978955218E-06	60	1899	0.0029577254	7.9077278877447E-05	L	L02
GO:0043954	cellular component maintenance	14	603	0.0003648436	8.68675162801627E-06	11	131	0.0019423804	4.37473053318863E-05	L	L02
GO:0060242	contact inhibition	5	89	0.0014118907	5.07546184537948E-05	5	23	0.002486867	6.24117195856476E-05	L	L02
GO:0051651	maintenance of location in cell	19	1407	0.004409416	0.0001957849	16	296	0.0058145493	0.0001983046	L	L02
GO:0007166	cell surface receptor signaling pathway	167	24971	0.0061742749	0.0002940131	154	6052	0.001597258	3.18629334250509E-05	L	L02
GO:0050793	regulation of developmental process	218	27085	1.05127112370056E-10	4.73545551216467E-13	194	6774	1.14243451872482E-08	5.88125878365415E-11	L	L03
GO:0048519	negative regulation of biological process	291	43884	1.80973368533109E-06	1.97976014482809E-08	263	11109	8.42544060965928E-05	0.000001247	L	L03
GO:0048523	negative regulation of cellular process	274	40881	2.97646171889977E-06	3.44763905664067E-08	249	10296	4.30860918908764E-05	5.54518557154137E-07	L	L03
GO:0050794	regulation of cellular process	421	69476	5.11076601739155E-06	6.2486843198481E-08	390	18005	2.77268990223504E-05	3.21160992536877E-07	L	L03
GO:0044087	regulation of cellular component biogenesis	71	7371	1.56551262090046E-05	2.11555759581143E-07	57	1749	0.0022178847	5.28067787864206E-05	L	L03
GO:0051239	regulation of multicellular organismal process	207	29717	2.34043325181482E-05	3.3133546679489E-07	186	7616	0.0017269571	3.55615365170649E-05	L	L03
GO:0051093	negative regulation of developmental process	88	10543	0.000336638	7.36530997903405E-06	78	2708	0.0044126273	0.0001362974	L	L03
GO:0022603	regulation of anatomical structure morphogenesis	98	12587	0.0010787527	3.26352328170988E-05	86	3094	0.0058145493	0.0001970281	L	L03
GO:0032879	regulation of localization	157	22283	0.0011814326	3.78860607728485E-05	148	5683	0.0007789954	1.45372367469867E-05	L	L03
GO:0040012	regulation of locomotion	71	8321	0.0011814326	3.80126307610441E-05	63	2098	0.0062038498	0.0002155778	L	L03
GO:0006935	chemotaxis	93	9594	4.64402606563918E-07	4.18380726634161E-09	81	2287	3.33575143308501E-06	3.52509861211483E-08	L	L04
GO:0042330	taxis	95	9961	6.86563644534999E-07	7.0688663529987E-09	83	2368	3.33575143308501E-06	3.64914892937227E-08	L	L04
GO:1990089	response to nerve growth factor	9	320	0.0013410887	4.52718078540126E-05	7	57	0.0035059902	0.0001015248	L	L04
GO:0050877	neurological system process	89	9870	2.71198540990082E-05	4.01387801980172E-07	84	2688	0.0002230001	3.5875169969058E-06	L	L05
GO:0022607	cellular component assembly	167	23593	0.0002401177	4.63547605211688E-06	155	5731	6.04872015676714E-05	8.17394615779343E-07	L	L06
GO:0051128	regulation of cellular component organization	172	24417	0.0002841465	5.93353863725978E-06	155	5798	0.0001087016	1.67878984036001E-06	L	L06
GO:0051130	positive regulation of cellular component organization	89	11558	0.0025836762	0.0001047436	77	2669	0.0045676163	0.0001440239	L	L06
GO:0051640	organelle localization	57	5894	0.0004585129	1.15070811072127E-05	47	1373	0.0029577254	7.99385255368369E-05	L	L07
GO:0048871	multicellular organismal homeostasis	34	2943	0.0005934162	1.5656412259613E-05	31	787	0.0041808257	0.0001264471	L	L08
GO:0042592	homeostatic process	99	13220	0.0019203551	0.000074145	94	3518	0.0095750025	0.0003758527	L	L08
GO:0001502	cartilage condensation	39	562	2.2168934591212E-31	1.42657236751686E-34	22	155	2.54340530746172E-13	6.54673180813827E-16	M	M01
GO:0060174	limb bud formation	28	302	4.3507178339304E-27	1.11987589032958E-29	16	81	5.85628313607272E-12	3.01481757326781E-14	M	M01
GO:0060351	cartilage development involved in endochondral bone morphogenesis	26	477	8.47653091393059E-20	2.72732654888372E-22	14	118	1.02655833586246E-07	1.51935918435242E-09	M	M01
GO:0034505	tooth mineralization	19	201	1.01359244616109E-17	4.56573173946436E-20	9	51	2.27134883136857E-06	3.94635897342029E-08	M	M01
GO:0048468	cell development	217	29618	1.38633363250153E-17	7.13685267697058E-20	181	7197	1.88644263280303E-15	1.2139270481358E-18	M	M01
GO:0032989	cellular component morphogenesis	168	21481	2.1327139908921E-15	1.74698202684386E-17	134	5096	6.36904486730203E-12	3.68863602353399E-14	M	M01
GO:0007507	heart development	97	9216	2.1327139908921E-15	1.78412367320446E-17	75	2163	4.96531729869679E-11	3.51470336458589E-13	M	M01
GO:0009887	organ morphogenesis	142	17047	1.13736467857417E-14	1.24422133434754E-16	114	4191	1.13502488717639E-10	9.49506018873432E-13	M	M01
GO:0048731	system development	295	50262	1.17259945244321E-13	1.54368618185563E-15	253	12765	2.46612727471579E-12	9.52172692940459E-15	M	M01
GO:0061061	muscle structure development	98	10328	5.4744137691544E-13	8.10241420145117E-15	85	2486	2.8620159720864E-12	1.2891963838227E-14	M	M01
GO:0048869	cellular developmental process	261	43485	2.96631019710966E-12	4.77205630165647E-14	220	10811	1.33180068943378E-10	1.19982044093134E-12	M	M01
GO:0048568	embryonic organ development	81	8091	6.07233041368386E-12	1.0550381027636E-13	61	2045	1.64521980643912E-06	2.7526200107733E-08	M	M01
GO:0031099	regeneration	38	2302	2.74360359114287E-11	4.94342989395112E-13	28	631	6.217541551999E-06	1.35127033089877E-07	M	M01
GO:0060343	trabecula formation	19	595	9.93561726167517E-11	1.98200859145386E-12	10	128	0.000433933	1.56340552856411E-05	M	M01
GO:0060325	face morphogenesis	22	782	2.71460594270073E-10	5.5899221471315E-12	12	173	0.0002324459	7.62853302101437E-06	M	M01
GO:0048839	inner ear development	43	3085	4.60733125169754E-10	9.78390806345037E-12	26	868	0.0060738803	0.0003296354	M	M01
GO:0060348	bone development	37	2414	5.30512745739709E-10	1.16070999711391E-11	26	605	2.87282996198163E-05	7.02493813097181E-07	M	M01
GO:0007275	multicellular organismal development	302	55719	1.22636977825529E-09	2.88835367619578E-11	261	14166	4.28110320757452E-09	4.95880680414038E-11	M	M01
GO:0048513	organ development	229	38874	1.44837053461872E-09	3.54170401000716E-11	202	9859	2.39254093589689E-09	2.61732277414717E-11	M	M01
GO:0060323	head morphogenesis	22	873	1.5348276036551E-09	3.85188394739698E-11	12	207	0.0011064191	4.55668114028989E-05	M	M01
GO:0007423	sensory organ development	88	10439	2.70031231179976E-09	7.12437611221301E-11	67	2627	6.09296804670062E-05	1.72516469790751E-06	M	M01
GO:0060324	face development	22	952	7.7067270615112E-09	2.1324920440475E-10	12	200	0.0008297837	3.25719480912293E-05	M	M01
GO:0048588	developmental cell growth	37	2680	0.000000014	3.97416673807413E-10	35	601	2.10989017834884E-10	2.17234509997306E-12	M	M01
GO:0060560	developmental growth involved in morphogenesis	42	3661	1.08861257322173E-07	3.22240530039893E-09	38	886	1.14096754356871E-07	1.76211203639956E-09	M	M01
GO:0048598	embryonic morphogenesis	84	10981	7.70262502699124E-07	2.6270214056019E-08	64	2723	0.001023088	4.08181808729351E-05	M	M01
GO:0001568	blood vessel development	68	8483	1.38414907766915E-06	5.07699468643125E-08	50	2126	0.0060390568	0.0003147771	M	M01
GO:0060739	mesenchymal-epithelial cell signaling involved in prostate gland development	7	55	1.66562111719976E-06	6.21660391232856E-08	3	8	0.0030786148	0.000152544	M	M01
GO:0060322	head development	81	11068	0.000007224	3.16108812457937E-07	67	2728	0.0002007975	6.22243037854424E-06	M	M01
GO:0003170	heart valve development	13	591	0.000020363	0.000001009	11	156	0.000433933	1.56372264670365E-05	M	M01
GO:0010927	cellular component assembly involved in morphogenesis	37	3630	2.18236569570553E-05	1.10943944633679E-06	31	838	5.28471547923973E-05	1.46230865899169E-06	M	M01
GO:0003179	heart valve morphogenesis	12	561	6.33954095866634E-05	3.46757388344041E-06	10	147	0.0011959387	5.15623514394667E-05	M	M01
GO:0002088	lens development in camera-type eye	17	1262	0.0001823673	1.0679167278925E-05	14	316	0.0039109225	0.0001963011	M	M01
GO:0048729	tissue morphogenesis	82	12726	0.000899488	6.01973933310495E-05	69	3131	0.0029511637	0.0001424307	M	M01
GO:0060060	post-embryonic retina morphogenesis in camera-type eye	4	59	0.0015632872	0.0001086454	5	10	6.217541551999E-06	0.000000136	M	M01
GO:0060042	retina morphogenesis in camera-type eye	12	735	0.0018008418	0.0001263139	11	222	0.0065022856	0.0003682118	M	M01
GO:0044236	multicellular organismal metabolic process	54	1462	3.4796610114565E-31	4.47832820007271E-34	32	372	2.43982903059842E-13	4.71009465366491E-16	M	M02
GO:0044712	single-organism catabolic process	77	6797	1.68552366828161E-14	1.95234401731461E-16	55	1875	1.10545258758098E-05	2.56089402528412E-07	M	M02
GO:0035640	exploration behavior	11	221	2.36170221478348E-07	7.44680878535332E-09	6	66	0.0064243583	0.0003558478	M	M02
GO:0043062	extracellular structure organization	81	4257	4.93152268579798E-28	9.52031406524706E-31	54	1002	2.69320142357754E-14	3.466153698298E-17	M	M03
GO:0022411	cellular component disassembly	66	5085	3.07345539982082E-15	2.96665579133283E-17	41	1168	5.32633353921651E-06	1.09679969919516E-07	M	M03
GO:0097435	fibril organization	13	120	1.17259945244321E-13	1.58459385465298E-15	7	31	9.81023863521449E-06	0.000000221	M	M03
GO:0006928	movement of cell or subcellular component	157	21878	5.96336075207532E-11	1.11285367960222E-12	128	5366	1.68759642740666E-08	2.17193877401115E-10	M	M03
GO:0030030	cell projection organization	144	19211	8.66179104667576E-11	1.67216043372119E-12	120	4564	1.90494856319972E-10	1.83875343938197E-12	M	M03
GO:0030029	actin filament-based process	82	9761	1.9641072453397E-08	5.68756924326169E-10	71	2269	1.55659009700515E-08	1.90316678527014E-10	M	M03
GO:0050808	synapse organization	43	4309	1.24946252883452E-05	5.86941857174518E-07	35	997	3.9671651657117E-05	9.95620601433439E-07	M	M03
GO:0009612	response to mechanical stimulus	51	2278	2.52540042245342E-19	9.75058078167342E-22	32	616	2.71015258907968E-08	3.66236836362119E-10	M	M04
GO:0071772	response to BMP	39	2033	1.25290332518601E-13	1.77373701120284E-15	26	545	4.76134668377654E-06	0.000000095	M	M04
GO:0001101	response to acid chemical	42	3939	2.51516783077019E-07	8.09256058806369E-09	32	1105	0.0026988963	0.0001267821	M	M04
GO:0010243	response to organonitrogen compound	70	8734	3.78477122016543E-07	1.24210638499638E-08	60	2368	0.0002446463	8.18636252630836E-06	M	M04
GO:0010035	response to inorganic substance	51	5613	9.36577052892907E-07	3.27166450816941E-08	39	1551	0.0074655505	0.0004275637	M	M04
GO:0042330	taxis	77	9961	1.83842156541044E-06	6.97985021616577E-08	58	2368	0.0008232049	0.000031784	M	M04
GO:0006935	chemotaxis	74	9594	3.11812804941589E-06	1.22397561785308E-07	55	2287	0.0019247286	8.54609225997335E-05	M	M04
GO:1901698	response to nitrogen compound	70	9328	3.56007178541059E-06	1.42206405489756E-07	60	2507	0.0010959447	4.44301895419327E-05	M	M04
GO:1901700	response to oxygen-containing compound	99	15160	5.23542418864221E-06	2.25722921904136E-07	91	4099	0.0002007975	6.33145400831591E-06	M	M04
GO:0071495	cellular response to endogenous stimulus	87	12570	1.32007630754887E-05	6.2860776549946E-07	72	3200	0.0011959387	5.10195975004382E-05	M	M04
GO:0009991	response to extracellular stimulus	44	4940	2.47192749228301E-05	1.27254954557684E-06	37	1294	0.0011558392	4.83459111069695E-05	M	M04
GO:0060021	palate development	40	1609	2.86521910032716E-17	1.65939330134778E-19	22	401	4.53676138711811E-06	8.75822661605814E-08	M	M05
GO:0009888	tissue development	189	25791	2.33949898374306E-15	2.10765674211086E-17	154	6429	5.11425878661762E-11	3.94923458426071E-13	M	M05
GO:0060023	soft palate development	15	136	5.86002578474149E-15	6.03348858145842E-17	8	39	3.53567073687358E-06	0.000000066	M	M05
GO:0009653	anatomical structure morphogenesis	235	37101	1.63642718901776E-12	2.5273006780197E-14	197	9062	2.15570714185783E-11	1.38719893298445E-13	M	M05
GO:0048646	anatomical structure formation involved in morphogenesis	106	16320	4.45706153668221E-05	2.40922245226066E-06	87	4001	0.0006623302	0.000024294	M	M05
GO:0001503	ossification	66	4459	3.70948027435572E-17	2.38705294360085E-19	46	1162	2.83025381488005E-08	4.00679433252002E-10	M	M06
GO:0003012	muscle system process	64	4925	7.09101914277508E-14	8.66984322475718E-16	56	1199	1.33153322080758E-12	4.28421242216082E-15	M	M06
GO:0048871	multicellular organismal homeostasis	45	2943	5.73272657818893E-12	9.59143442940233E-14	30	787	4.38377053249264E-05	1.18480284661963E-06	M	M06
GO:0050877	neurological system process	87	9870	1.22636977825529E-09	2.85052853164314E-11	62	2688	0.0020404447	0.000094538	M	M06
GO:0043503	skeletal muscle fiber adaptation	5	77	1.13817619202581E-05	5.27340320629717E-07	5	14	4.00563205795788E-05	1.03105072276908E-06	M	M06
GO:0050906	detection of stimulus involved in sensory perception	16	774	1.6183127969771E-05	0.000000781	10	198	0.0099313527	0.0005815657	M	M06
GO:0014888	striated muscle adaptation	8	522	0.0088474005	0.0007059702	7	98	0.0088733135	0.0005138985	M	M06
GO:0009611	response to wounding	106	10441	1.18261435591961E-16	8.37114408952103E-19	78	2763	1.48280500093758E-07	2.38546493072327E-09	M	M07
GO:0042246	tissue regeneration	20	776	2.70031231179976E-09	7.10864327633071E-11	14	234	0.0002324459	7.50212613182699E-06	M	M07
GO:0007162	negative regulation of cell adhesion	35	2395	1.22636977825529E-09	2.91992804346499E-11	21	637	0.0064243583	0.0003596648	M	M08
GO:0051128	regulation of cellular component organization	138	24417	0.0006069742	3.86682378568475E-05	116	5798	0.0008157361	3.09706766152156E-05	M	M08
GO:0001558	regulation of cell growth	37	4617	0.001205953	8.30353717481032E-05	35	1160	0.0007099079	2.64959183795581E-05	M	M08
GO:0022607	cellular component assembly	150	23593	1.24391654109413E-07	3.76216714487929E-09	126	5731	3.22014922296553E-06	0.000000058	M	M09
GO:0070271	protein complex biogenesis	90	12526	9.36577052892907E-07	3.31478364923487E-08	67	3105	0.0060738803	0.0003306153	M	M09
GO:0043933	macromolecular complex subunit organization	145	24414	0.000004186	1.77782544339679E-07	116	5887	0.0014131687	6.1837499979997E-05	M	M09
GO:0051240	positive regulation of multicellular organismal process	106	15369	5.02598735176663E-07	1.68179756944572E-08	92	3990	4.13909136112503E-05	0.000001092	M	M10
GO:0051094	positive regulation of developmental process	96	13974	3.56007178541059E-06	1.44327234543673E-07	81	3558	0.0002796123	9.7162570016241E-06	M	M10
GO:0022603	regulation of anatomical structure morphogenesis	89	12587	0.000003961	1.63128789437441E-07	74	3094	0.0001560048	4.71829279696922E-06	M	M10
GO:0002026	regulation of the force of heart contraction	11	434	1.06551823646458E-05	4.73106552870373E-07	10	107	0.0001088882	3.15313186835734E-06	M	M10
GO:0051239	regulation of multicellular organismal process	169	29717	1.06832177721479E-05	4.81226025772429E-07	149	7616	0.0001094529	3.23991952965389E-06	M	M10
GO:0048638	regulation of developmental growth	48	5543	3.8868328834402E-05	0.000002076	43	1308	1.3314086546555E-05	0.000000317	M	M10
GO:0050793	regulation of developmental process	153	27085	0.0001520014	8.60754329260833E-06	134	6774	0.0002517132	8.58481370352786E-06	M	M10
GO:0032879	regulation of localization	132	22283	0.0001863647	1.10331756271573E-05	112	5683	0.0019618587	8.86556186610608E-05	M	M10
GO:0044057	regulation of system process	47	6093	0.0005353992	3.37639114651906E-05	42	1591	0.0019618587	8.96344685799971E-05	M	M10
GO:0090066	regulation of anatomical structure size	39	5403	0.0061793638	0.0004652417	37	1361	0.0028365565	0.0001350741	M	M10
GO:0001505	regulation of neurotransmitter levels	25	2849	0.0064974133	0.0004933686	24	754	0.0045236907	0.0002328798	M	M10
GO:0006139	nucleobase-containing compound metabolic process	661	39987	4.64090360365294E-40	2.98642445537512E-43	557	10355	7.83388630958182E-35	5.04111088132678E-38	N	N01
GO:0034641	cellular nitrogen compound metabolic process	696	44188	9.79149393312721E-37	1.63240222507484E-39	580	11579	7.06787955504323E-28	1.81927401674214E-30	N	N01
GO:0046483	heterocycle metabolic process	663	41174	9.79149393312721E-37	1.89024979404E-39	559	10675	1.56679533718817E-31	2.01646761542879E-34	N	N01
GO:0006725	cellular aromatic compound metabolic process	662	41299	5.36530686200548E-36	1.38103136731158E-38	558	10748	2.1708827119242E-30	4.19089326626293E-33	N	N01
GO:1901360	organic cyclic compound metabolic process	665	42303	2.27405244067631E-33	7.31677104464708E-36	561	11076	1.51076154312678E-27	4.86088012589055E-30	N	N01
GO:0044260	cellular macromolecule metabolic process	798	55887	4.23574909086448E-27	2.4531365391107E-29	671	14414	1.32976874082006E-26	5.13424224254848E-29	N	N01
GO:0043170	macromolecule metabolic process	827	59179	2.94722551228915E-25	1.89654151369958E-27	696	15366	8.16631581196412E-25	3.67852063601987E-27	N	N01
GO:1901576	organic substance biosynthetic process	622	42311	1.79053067050652E-21	1.3826491664143E-23	507	10947	8.35756779392805E-14	1.07562005069859E-15	N	N01
GO:0044249	cellular biosynthetic process	617	41892	1.80766598539497E-21	1.51220449228666E-23	503	10844	8.86995982038009E-14	1.25572146749268E-15	N	N01
GO:0006413	translational initiation	46	1277	1.93468445427309E-14	3.2369237973681E-16	27	337	0.0015510436	8.58363893613646E-05	N	N01
GO:0019538	protein metabolic process	506	39601	3.51694255982711E-05	1.85578693633091E-06	415	10097	0.0015678312	8.87832342801857E-05	N	N01
GO:0043414	macromolecule methylation	51	2592	0.0018001921	0.0001216346	43	569	0.000078885	3.55338021463062E-06	N	N01
GO:0007049	cell cycle	370	19194	2.21884571776545E-28	8.5669718832643E-31	293	4583	4.71038998337726E-24	2.4249111883538E-26	N	N02
GO:0022402	cell cycle process	313	15127	4.34458629210765E-28	1.95702085230074E-30	245	3604	7.23357009265815E-23	4.18932630848928E-25	N	N02
GO:1903047	mitotic cell cycle process	204	9684	1.08009082951943E-18	1.04255871575235E-20	158	2264	8.62555001784537E-15	9.99098457665487E-17	N	N02
GO:0010564	regulation of cell cycle process	145	5919	3.44698706847952E-18	3.99264911406894E-20	116	1488	8.86995982038009E-14	1.21112864753118E-15	N	N02
GO:0007051	spindle organization	76	2381	9.90089173615033E-15	1.59280755086074E-16	55	536	1.330534972563E-10	2.39736031092432E-12	N	N02
GO:0051301	cell division	160	7748	1.24159193408403E-13	2.23710258393519E-15	131	1839	1.00814062397866E-12	1.49210002261964E-14	N	N02
GO:0090068	positive regulation of cell cycle process	72	2413	7.62230747359554E-13	1.56958712454992E-14	54	662	5.9938304121464E-07	1.65852450271747E-08	N	N02
GO:0007059	chromosome segregation	66	2311	1.86857440767559E-10	4.44898668494188E-12	50	552	7.73744458776688E-08	1.89203921708585E-09	N	N02
GO:0051321	meiotic cell cycle	75	2955	5.28954264136167E-10	1.39556787835154E-11	58	704	1.30657428359955E-07	3.36312556911081E-09	N	N02
GO:1903046	meiotic cell cycle process	68	2708	6.75277287466198E-09	1.99889029751899E-10	54	653	3.85501772121991E-07	1.04189668141079E-08	N	N02
GO:0010948	negative regulation of cell cycle process	60	2425	2.32160908699193E-08	7.46978470718125E-10	44	608	0.0001781713	0.000008255	N	N02
GO:0044770	cell cycle phase transition	104	5409	2.43975289215264E-08	8.00691103602218E-10	81	1323	3.89482835879708E-05	1.52885797867839E-06	N	N02
GO:0000075	cell cycle checkpoint	61	2574	6.223017027809E-08	2.2024835040508E-09	49	670	4.48009122099411E-05	1.90274144520985E-06	N	N02
GO:0007093	mitotic cell cycle checkpoint	46	1768	2.43073205777041E-07	9.38506586011742E-09	33	461	0.002197594	0.0001329304	N	N02
GO:0022412	cellular process involved in reproduction in multicellular organism	117	6406	4.10865463270491E-07	1.61279235904118E-08	92	1441	0.000001501	4.24989405137998E-08	N	N02
GO:0000212	meiotic spindle organization	16	240	4.64140760530502E-07	1.85178424407279E-08	10	44	0.000060733	2.61847543997402E-06	N	N02
GO:0007126	meiotic nuclear division	58	2462	1.07373222753621E-06	4.49115796588504E-08	49	602	2.55748593915081E-06	8.22871923793698E-08	N	N02
GO:0051304	chromosome separation	22	563	8.37890207295168E-06	0.000000399	18	136	4.12965933847154E-05	1.72733498713417E-06	N	N02
GO:0098813	nuclear chromosome segregation	40	1540	0.000047377	2.56091942897503E-06	34	370	1.53591212721359E-05	5.33714638800089E-07	N	N02
GO:0031570	DNA integrity checkpoint	41	1800	5.61110729326348E-05	3.17746101549026E-06	32	475	0.0068568307	0.0004853612	N	N02
GO:0031577	spindle checkpoint	18	497	0.0001044179	6.11456312740033E-06	14	116	0.0012541492	6.77918480807768E-05	N	N02
GO:0007017	microtubule-based process	127	7557	0.0001070118	6.33531733442464E-06	104	1736	3.82052236821217E-06	1.27842447327563E-07	N	N02
GO:0051171	regulation of nitrogen compound metabolic process	549	33779	1.9907886015591E-27	1.02485899694162E-29	443	8446	2.75962550638084E-21	1.77582078917686E-23	N	N03
GO:0009889	regulation of biosynthetic process	527	33055	7.43908053475554E-24	5.26575842228513E-26	422	8270	2.32374622631123E-17	2.09346506874886E-19	N	N03
GO:0080090	regulation of primary metabolic process	636	43304	1.00074822098331E-20	9.01574973858837E-23	524	10953	7.04889528523381E-18	5.3103553706762E-20	N	N03
GO:0031323	regulation of cellular metabolic process	638	44337	1.50452198117108E-18	1.64587346717557E-20	526	11186	2.59793369982303E-16	2.674835212173E-18	N	N03
GO:0019222	regulation of metabolic process	685	48651	6.70369080451518E-18	8.62765869306973E-20	567	12301	1.06036657271415E-16	1.02351985783219E-18	N	N03
GO:0016458	gene silencing	79	2966	8.99093912378901E-11	2.08284304026E-12	60	570	4.95468616028618E-12	7.65202495797093E-14	N	N03
GO:0051172	negative regulation of nitrogen compound metabolic process	265	16273	2.43224919325621E-10	5.94758489985431E-12	215	3941	1.60496234977909E-09	3.10527980943747E-11	N	N03
GO:0051173	positive regulation of nitrogen compound metabolic process	294	19056	9.37432627415523E-10	2.53360169571763E-11	244	4647	0.000000002	4.17697887649896E-11	N	N03
GO:0009892	negative regulation of metabolic process	366	24824	2.06459697942598E-09	5.71284878476945E-11	308	6165	6.13362034145788E-10	1.14462670464787E-11	N	N03
GO:0031324	negative regulation of cellular metabolic process	337	22574	3.82916126452494E-09	1.0841898046274E-10	282	5566	1.60496234977909E-09	3.20166234511917E-11	N	N03
GO:0009891	positive regulation of biosynthetic process	281	18605	1.90800720457886E-08	5.89345854696174E-10	236	4569	2.15769040050937E-08	4.9985105803306E-10	N	N03
GO:0009890	negative regulation of biosynthetic process	251	16351	1.68535717400374E-07	6.07335918559907E-09	202	3996	2.50846081120494E-06	7.87047941988E-08	N	N03
GO:0010610	regulation of mRNA stability involved in response to stress	7	37	5.53058140883782E-06	2.56243154077428E-07	4	4	4.0351830624942E-05	1.60991859636191E-06	N	N03
GO:0009893	positive regulation of metabolic process	397	29859	3.11129079413299E-05	1.60169410251377E-06	335	7511	1.66518162926355E-05	6.00065451986864E-07	N	N03
GO:0050794	regulation of cellular process	835	69476	3.30945296734299E-05	0.000001725	701	18005	6.60316858487679E-05	2.9319088311229E-06	N	N03
GO:0031325	positive regulation of cellular metabolic process	363	27287	9.87841164380823E-05	5.72108782459936E-06	309	6839	1.90171515567327E-05	6.97540308065484E-07	N	N03
GO:0048519	negative regulation of biological process	545	43884	0.0005757673	3.66801530035646E-05	452	11109	0.0014644921	8.01041371796593E-05	N	N03
GO:0048522	positive regulation of cellular process	532	42418	0.0006526877	4.28405077633272E-05	441	10712	0.0006257978	3.14106989285828E-05	N	N03
GO:0048523	negative regulation of cellular process	509	40881	0.001383121	9.2564081177914E-05	421	10296	0.0020704597	0.0001239078	N	N03
GO:0048518	positive regulation of biological process	583	47613	0.0025807267	0.0001826769	483	12136	0.005433453	0.0003636288	N	N03
GO:0043933	macromolecular complex subunit organization	401	24414	1.35891284511847E-18	1.39913806447204E-20	319	5887	3.73364373094679E-15	4.08442364389288E-17	N	N04
GO:0006996	organelle organization	506	32726	8.23156011187537E-18	1.11237298809127E-19	404	7756	7.42558361145871E-18	6.21187818204397E-20	N	N04
GO:1902589	single-organism organelle organization	407	25107	3.42624236323459E-16	5.07101508072044E-18	327	5834	7.04889528523381E-18	5.44316238241993E-20	N	N04
GO:0035041	sperm chromatin decondensation	8	72	2.93476051578302E-05	1.49193102153706E-06	4	12	0.0087104415	0.0006333847	N	N04
GO:0035042	fertilization, exchange of chromosomal proteins	8	72	2.93476051578302E-05	1.49193102153706E-06	4	12	0.0087104415	0.0006333847	N	N04
GO:0071166	ribonucleoprotein complex localization	44	763	3.73631823844894E-18	4.56821406245366E-20	29	165	6.38405173195496E-11	1.10919817736669E-12	N	N05
GO:0051236	establishment of RNA localization	55	1472	1.53805990178687E-13	2.87025335597292E-15	41	317	6.38405173195496E-11	1.08442356429363E-12	N	N05
GO:0006403	RNA localization	63	2007	6.29385147269093E-12	1.41753411547093E-13	46	439	3.50922175212887E-09	7.67783394931671E-11	N	N05
GO:0022613	ribonucleoprotein complex biogenesis	74	2326	1.83684636531772E-16	2.60042599980629E-18	47	567	2.69331183252406E-06	8.83905427662338E-08	N	N06
GO:0044702	single organism reproductive process	288	16212	3.72708283186441E-16	5.75611248164387E-18	235	3972	2.42640561515824E-14	2.96664779202102E-16	N	N07
GO:0007276	gamete generation	183	9300	3.36670165983926E-13	6.49942405374374E-15	143	2141	7.91353710766148E-12	1.2730915552866E-13	N	N07
GO:0044703	multi-organism reproductive process	221	12973	2.64610969860046E-10	6.6408158459085E-12	177	3081	2.5100672667302E-09	5.33025867452358E-11	N	N07
GO:0048609	multicellular organismal reproductive process	205	11787	4.42556275761212E-10	1.13914099295035E-11	163	2804	0.000000007	1.57093162847059E-10	N	N07
GO:0016032	viral process	119	5391	1.94384831882449E-14	3.37734263888425E-16	90	1322	1.17730122935965E-07	0.000000003	N	N08
GO:0044403	symbiosis, encompassing mutualism through parasitism	120	5751	6.89955189756109E-13	1.37635848664346E-14	91	1436	0.000002354	7.1196952811677E-08	N	N08
GO:0051817	modification of morphology or physiology of other organism involved in symbiotic interaction	65	3018	1.68826193293277E-07	6.19246654936729E-09	48	660	6.44818124005802E-05	2.82159796862256E-06	N	N08
GO:0051701	interaction with host	61	3006	3.73839093296045E-06	1.70801644942209E-07	46	691	0.0008167069	4.20441123285273E-05	N	N08
GO:0048608	reproductive structure development	166	8607	3.69868558421673E-12	7.85435162671507E-14	132	2183	4.57518310780126E-08	1.08932931138125E-09	N	N09
GO:0048806	genitalia development	67	2338	5.39738915286269E-12	1.18089595365078E-13	48	583	2.50846081120494E-06	7.90956111641199E-08	N	N09
GO:0007548	sex differentiation	104	5249	1.87547329003854E-08	5.67228086433791E-10	79	1363	0.000323759	1.52087582268228E-05	N	N09
GO:0007281	germ cell development	109	5540	3.57355560415677E-08	1.24177607866451E-09	85	1238	2.15785985181906E-07	5.69319523324205E-09	N	N09
GO:0009793	embryo development ending in seed dormancy	21	467	1.05894495879513E-06	4.36116327946513E-08	16	106	2.90516505583856E-05	0.000001103	N	N09
GO:0048316	seed development	22	510	1.26094492221866E-06	5.35536453451943E-08	17	118	2.69529435525758E-05	0.000001006	N	N09
GO:0010228	vegetative to reproductive phase transition of meristem	17	319	2.02971337598215E-06	8.88162867225135E-08	12	62	4.07288558895742E-05	1.65116983336112E-06	N	N09
GO:0008406	gonad development	82	4342	2.26617514294743E-06	1.02079961394029E-07	64	1124	0.0026496295	0.0001636837	N	N09
GO:0045137	development of primary sexual characteristics	82	4455	0.000006746	3.16895446688425E-07	64	1156	0.0053293678	0.0003498041	N	N09
GO:0090567	reproductive shoot system development	20	555	5.27655110190201E-05	2.95405370569804E-06	15	125	0.0007934828	4.03379285679646E-05	N	N09
GO:0021678	third ventricle development	15	184	6.26448158882251E-09	1.81403907012235E-10	7	26	0.0005265887	2.60922307156186E-05	N	N10
GO:0021592	fourth ventricle development	15	198	2.27092357998265E-08	7.16056984679215E-10	7	33	0.0022293593	0.0001362864	N	N10
GO:0021670	lateral ventricle development	16	235	2.94082434456707E-08	0.000000001	8	42	0.0017453533	0.0001022054	N	N10
GO:0048598	embryonic morphogenesis	187	10981	3.52331491864933E-08	1.20164537122532E-09	149	2723	0.000002119	6.13622130957763E-08	N	N10
GO:0035239	tube morphogenesis	149	8300	1.8915210344222E-07	7.059731016505E-09	115	2024	1.17511837829934E-05	4.00780399291281E-07	N	N10
GO:0009791	post-embryonic development	148	8705	2.34306650255736E-07	8.89581233274675E-09	115	2084	4.08479410456794E-05	1.68228328630855E-06	N	N10
GO:0019827	stem cell population maintenance	56	2308	5.08244583988479E-07	2.06045101616951E-08	45	526	2.26361489377651E-06	0.000000067	N	N10
GO:0021915	neural tube development	69	3119	1.65911084980481E-06	7.15318062657158E-08	54	758	3.28687896162701E-05	1.26906523614943E-06	N	N10
GO:0048367	shoot system development	30	920	0.000002212	9.8217811191009E-08	23	196	1.66518162926355E-05	5.90233555085828E-07	N	N10
GO:0001756	somitogenesis	39	1464	1.12197507375091E-05	5.41493761462796E-07	31	381	0.0004075849	1.96710862502801E-05	N	N10
GO:0030901	midbrain development	25	818	0.000051147	2.83052862858188E-06	19	208	0.0028610108	0.000178583	N	N10
GO:0035295	tube development	178	11627	0.0001668691	9.98637553839783E-06	143	2929	0.0010574435	5.5798178708606E-05	N	N10
GO:0007389	pattern specification process	150	9476	0.0001697855	1.02701651383755E-05	116	2399	0.00631241	0.0004427623	N	N10
GO:0035148	tube formation	56	2738	0.0004673117	2.88686736723892E-05	43	660	0.0020250846	0.0001198892	N	N10
GO:0061343	cell adhesion involved in heart morphogenesis	6	49	0.0006142725	3.98658140855891E-05	4	11	0.0062519744	0.0004345002	N	N10
GO:0001833	inner cell mass cell proliferation	10	194	0.0019246759	0.0001312842	8	42	0.0017453533	0.0001022054	N	N10
GO:0030902	hindbrain development	57	3115	0.0025807267	0.0001820925	44	730	0.0075305882	0.0005378992	N	N10
GO:0060592	mammary gland formation	11	260	0.0035979426	0.0002692421	10	61	0.0010554746	5.50150838684652E-05	N	N10
GO:0001832	blastocyst growth	14	463	0.0044261638	0.0003474852	10	77	0.0059300095	0.0004006763	N	N10
GO:0048729	tissue morphogenesis	178	12726	0.0084630188	0.0007188665	148	3131	0.0029893622	0.0001885183	N	N10
GO:0009888	tissue development	331	25791	0.0087599297	0.0007561849	274	6429	0.0053620919	0.0003554025	N	N10
GO:0008345	larval locomotory behavior	9	164	0.0035979426	0.0002708876	8	30	0.0001620551	7.40406079762753E-06	N	N11
GO:0030537	larval behavior	9	179	0.0052277592	0.0004373286	8	35	0.0005197172	2.54173127305263E-05	N	N11
GO:0009889	regulation of biosynthetic process	404	33055	2.7219329619607E-28	1.75156561258732E-31	342	8270	7.09735489954394E-20	3.19700671150628E-22	O	O01
GO:0009890	negative regulation of biosynthetic process	250	16351	1.02913193256235E-26	1.32449412170186E-29	208	3996	2.16246468925435E-20	7.83185273791867E-23	O	O01
GO:0051172	negative regulation of nitrogen compound metabolic process	248	16273	1.5192796903752E-26	2.9329723752417E-29	206	3941	2.16246468925435E-20	8.34928451449555E-23	O	O01
GO:0051171	regulation of nitrogen compound metabolic process	401	33779	7.38545825806872E-26	1.90101885664575E-28	340	8446	1.01863086510331E-17	6.55489617183597E-20	O	O01
GO:0031323	regulation of cellular metabolic process	487	44337	1.13307560506058E-25	3.64567440495681E-28	423	11186	9.24210338889229E-20	4.75783958244134E-22	O	O01
GO:0009892	negative regulation of metabolic process	325	24824	2.80379077641607E-25	1.08254470131895E-27	280	6165	2.16246468925435E-20	7.20315090641277E-23	O	O01
GO:0031324	negative regulation of cellular metabolic process	303	22574	6.80205011572268E-25	3.06398653861382E-27	261	5566	2.16246468925435E-20	6.39098031947044E-23	O	O01
GO:0019222	regulation of metabolic process	516	48651	3.5510515656255E-24	1.82808317406718E-26	452	12301	1.05092080325347E-19	6.08641391845638E-22	O	O01
GO:0080090	regulation of primary metabolic process	472	43304	8.70330062649903E-24	5.04052159835851E-26	410	10953	1.02325914648709E-17	7.24314711155598E-20	O	O01
GO:0051173	positive regulation of nitrogen compound metabolic process	258	19056	1.54309651968081E-21	1.29087868441767E-23	211	4647	2.86553346991727E-14	3.87234252691523E-16	O	O01
GO:0009891	positive regulation of biosynthetic process	246	18605	3.08066023941017E-19	4.55953574687477E-21	203	4569	1.15546804954019E-12	1.85886108355887E-14	O	O01
GO:0031325	positive regulation of cellular metabolic process	322	27287	1.81823287250636E-18	3.04208846107885E-20	280	6839	2.86553346991727E-14	3.52464156364506E-16	O	O01
GO:0009893	positive regulation of metabolic process	343	29859	4.0800693063894E-18	7.61402895014752E-20	300	7511	2.86553346991727E-14	3.83336480378523E-16	O	O01
GO:0016458	gene silencing	62	2966	2.49508522899224E-11	8.50962143736093E-13	48	570	1.42970195168195E-10	3.31205085331727E-12	O	O01
GO:0009896	positive regulation of catabolic process	47	2828	1.05039007780736E-05	7.2324155936543E-07	45	753	1.08275637483623E-05	5.78306171888076E-07	O	O01
GO:0043487	regulation of RNA stability	20	833	3.06573027187967E-05	2.22926332511199E-06	17	171	6.08423332606013E-05	3.92927944699304E-06	O	O01
GO:0009894	regulation of catabolic process	67	5407	0.0005088495	4.87892999462662E-05	63	1367	0.0003049791	2.21767298334635E-05	O	O01
GO:0007166	cell surface receptor signaling pathway	322	24971	2.59082020120614E-23	1.66719446667062E-25	281	6052	2.51514025631313E-21	1.61849437343187E-24	O	O02
GO:0048523	negative regulation of cellular process	449	40881	5.20838492274335E-22	3.68675895432284E-24	386	10296	6.26089755102141E-16	5.23755908386605E-18	O	O02
GO:0007165	signal transduction	451	42185	5.29054254875323E-19	8.17072208301657E-21	395	10776	8.07784774439202E-15	8.31696035458638E-17	O	O02
GO:0050794	regulation of cellular process	643	69476	2.01499158916723E-17	3.88994515283248E-19	576	18005	7.80003735761685E-16	7.0270606825377E-18	O	O02
GO:0048522	positive regulation of cellular process	444	42418	3.21362121457513E-17	6.41069869059388E-19	386	10712	5.41775365195026E-13	8.36718710725909E-15	O	O02
GO:0048518	positive regulation of biological process	466	47613	4.60894027138556E-13	1.33463521372169E-14	408	12136	2.3688469683509E-09	8.23151456183709E-11	O	O02
GO:0051128	regulation of cellular component organization	277	24417	4.61811693899918E-13	1.36701016212331E-14	232	5798	3.46866506733227E-10	9.37477045224938E-12	O	O02
GO:0042127	regulation of cell proliferation	185	15551	7.20393570377581E-10	2.68872761144786E-11	157	3964	0.000003608	1.78774563533326E-07	O	O02
GO:0010646	regulation of cell communication	299	28504	1.67438999289244E-09	6.78806753875313E-11	263	7158	4.35016675003962E-08	1.79157446591078E-09	O	O02
GO:0010647	positive regulation of cell communication	173	14377	3.23397838115966E-09	1.41512567515352E-10	147	3680	6.00144822499093E-06	3.05092927782679E-07	O	O02
GO:0009966	regulation of signal transduction	261	24737	1.8655180884E-08	9.12351188664093E-10	235	6153	1.82934996349493E-08	7.06312727218119E-10	O	O02
GO:0008284	positive regulation of cell proliferation	105	8139	2.28207418099403E-07	1.2776090974677E-08	87	2174	0.0013830482	0.000113919	O	O02
GO:0035556	intracellular signal transduction	225	21448	3.84439503652366E-07	2.22648361188629E-08	196	5394	2.76491983465838E-05	1.67247403126054E-06	O	O02
GO:0009967	positive regulation of signal transduction	146	12735	1.20563289837559E-06	7.52550779552332E-08	130	3273	3.89543957754307E-05	2.43151633862084E-06	O	O02
GO:0051130	positive regulation of cellular component organization	134	11558	1.30078486385383E-06	0.000000082	115	2669	4.09786493539162E-06	2.05684340386452E-07	O	O02
GO:0030522	intracellular receptor signaling pathway	52	3392	9.49009644235979E-06	6.41222732591877E-07	46	812	3.02871059807899E-05	0.000001871	O	O02
GO:0090068	positive regulation of cell cycle process	38	2413	0.0001815714	1.48388475828413E-05	35	662	0.0014827848	0.0001259508	O	O02
GO:0009968	negative regulation of signal transduction	124	11483	0.000272813	2.33488615034977E-05	117	2831	2.24555726305547E-05	0.000001315	O	O02
GO:0010564	regulation of cell cycle process	72	5919	0.0002973653	2.60624344838371E-05	68	1488	0.0001929133	1.35312384823875E-05	O	O02
GO:0051129	negative regulation of cellular component organization	78	6897	0.0017743537	0.0001895384	66	1638	0.0067842751	0.0006679499	O	O02
GO:0008285	negative regulation of cell proliferation	83	7712	0.0047956269	0.0006048538	76	1906	0.0037680717	0.0003540145	O	O02
GO:0010648	negative regulation of cell communication	125	12692	0.007211503	0.000955965	118	3186	0.0018915012	0.000166754	O	O02
GO:1901576	organic substance biosynthetic process	454	42311	8.21928860720114E-22	6.34694100942173E-24	390	10947	2.127131243107E-12	3.55890684174917E-14	O	O03
GO:0044249	cellular biosynthetic process	448	41892	3.90837976461674E-21	3.77256734036364E-23	386	10844	3.90006460175454E-12	7.27811283467706E-14	O	O03
GO:0006725	cellular aromatic compound metabolic process	439	41299	2.21631802102081E-20	2.56716373091214E-22	375	10748	3.16550812299913E-10	8.31887970154541E-12	O	O03
GO:0006139	nucleobase-containing compound metabolic process	428	39987	2.91326064703843E-20	3.56190169200323E-22	368	10355	4.64888451381816E-11	1.04704606167076E-12	O	O03
GO:0046483	heterocycle metabolic process	437	41174	3.45632072526E-20	4.44828922169884E-22	373	10675	3.16550812299913E-10	8.35172670804146E-12	O	O03
GO:1901360	organic cyclic compound metabolic process	446	42303	3.83141811293138E-20	5.17759204450186E-22	382	11076	7.65410588844995E-10	2.31494837038062E-11	O	O03
GO:0044260	cellular macromolecule metabolic process	551	55887	7.12003335248043E-20	1.00798412969478E-21	487	14414	3.02758051726053E-14	4.28615002443575E-16	O	O03
GO:0043170	macromolecule metabolic process	570	59179	1.8258685945439E-18	3.17235856194886E-20	503	15366	3.27295826070566E-12	5.89722209136155E-14	O	O03
GO:0034641	cellular nitrogen compound metabolic process	452	44188	3.12388726978083E-18	5.62862571131682E-20	389	11579	1.72579718374995E-08	6.55225442993869E-10	O	O03
GO:0043414	macromolecule methylation	63	2592	3.32336568088627E-14	9.40978699864838E-16	50	569	1.1248664004636E-11	2.31632720816186E-13	O	O03
GO:0019538	protein metabolic process	384	39601	0.000000001	3.73631151212726E-11	341	10097	4.91900928581894E-07	2.27907766138329E-08	O	O03
GO:0048519	negative regulation of biological process	470	43884	1.59639236608418E-21	1.43819132079656E-23	403	11109	1.47908391563462E-14	1.61804546755396E-16	O	O04
GO:0048583	regulation of response to stimulus	315	30761	1.34733282711976E-09	5.28875820169277E-11	282	7799	3.77806304314303E-08	1.50733531965809E-09	O	O04
GO:0023051	regulation of signaling	297	28279	1.66529805832146E-09	6.64404630733144E-11	260	7119	1.00595310386874E-07	4.46658714072995E-09	O	O04
GO:0023056	positive regulation of signaling	170	14186	5.86302673809724E-09	2.67873164996721E-10	143	3663	2.82664292284429E-05	0.000001728	O	O04
GO:0050793	regulation of developmental process	280	27085	7.48745887454951E-09	3.4690929148492E-10	239	6774	1.17430856182238E-05	6.34761384768852E-07	O	O04
GO:0048638	regulation of developmental growth	83	5543	5.41399301104456E-08	2.82196546907728E-09	69	1308	1.50275370134607E-06	7.25267230379379E-08	O	O04
GO:0048584	positive regulation of response to stimulus	186	16977	2.23359149230972E-07	1.23609310385223E-08	168	4374	8.27433049242138E-06	4.31287496709223E-07	O	O04
GO:0048640	negative regulation of developmental growth	33	1644	1.12747164385396E-05	7.83571026616649E-07	27	379	7.28567888213867E-05	4.8758726109551E-06	O	O04
GO:0048585	negative regulation of response to stimulus	137	13819	0.0021998582	0.0002463162	127	3480	0.0018940631	0.0001681987	O	O04
GO:0023057	negative regulation of signaling	125	12569	0.0052526584	0.0006760178	118	3158	0.0014001641	0.0001162298	O	O04
GO:1902589	single-organism organelle organization	313	25107	1.03712228416387E-20	1.06782217159729E-22	272	5834	6.93196102752409E-21	8.92144276386627E-24	O	O05
GO:0006996	organelle organization	359	32726	6.20629105663584E-16	1.39781330104411E-17	314	7756	5.17386140559961E-16	3.99525977266379E-18	O	O05
GO:0043933	macromolecular complex subunit organization	272	24414	1.29727657844312E-12	4.00703190252701E-14	235	5887	3.16550812299913E-10	7.99408570379624E-12	O	O05
GO:0030030	cell projection organization	217	19211	0.000000013	6.1716064962517E-10	177	4564	1.89986630811497E-06	9.29149545796252E-08	O	O05
GO:0022607	cellular component assembly	242	23593	2.08894268862031E-07	1.14260056970866E-08	214	5731	9.65789250385151E-07	0.000000046	O	O05
GO:0045132	meiotic chromosome segregation	16	529	5.0580293904448E-05	3.77562039441182E-06	15	136	6.08423332606013E-05	4.03266430234359E-06	O	O05
GO:0045478	fusome organization	9	173	6.29703819016084E-05	4.78153479046962E-06	5	26	0.0058843906	0.0005679914	O	O05
GO:0007126	meiotic nuclear division	39	2462	0.0001633657	1.29304871226003E-05	37	602	4.92890924576427E-05	3.10832114597747E-06	O	O05
GO:0032535	regulation of cellular component size	56	4260	0.0003288117	3.00301113900372E-05	47	1015	0.0024859905	0.0002239631	O	O05
GO:0007062	sister chromatid cohesion	13	454	0.0005539646	5.41844417060053E-05	14	104	1.36664700161174E-05	7.65111255728579E-07	O	O05
GO:0070192	chromosome organization involved in meiosis	8	236	0.0034118679	0.0004083703	9	64	0.000648882	5.09418276786336E-05	O	O05
GO:0007389	pattern specification process	162	9476	1.09255607161724E-20	1.19520290974859E-22	133	2399	2.85963491537237E-14	3.31231843479425E-16	O	O06
GO:0007275	multicellular organismal development	544	55719	1.3882376947406E-16	2.85866191967176E-18	474	14166	2.16921736041731E-12	3.76891047176753E-14	O	O06
GO:0009887	organ morphogenesis	226	17047	1.53228155389953E-16	3.2538797476631E-18	195	4191	5.17347396376175E-14	7.65700779707337E-16	O	O06
GO:0035295	tube development	172	11627	3.61516344282162E-16	7.90962400617343E-18	143	2929	2.66034548729034E-11	5.82057571221825E-13	O	O06
GO:0048513	organ development	408	38874	1.89537538083244E-15	4.51279852579152E-17	352	9859	1.56421971222113E-10	3.72433264814555E-12	O	O06
GO:0060322	head development	163	11068	6.64183256146846E-15	1.62412894038482E-16	131	2728	7.62795730804261E-10	2.25795390070759E-11	O	O06
GO:0048731	system development	496	50262	8.27136068861133E-15	2.07582411104145E-16	430	12765	1.82697060138734E-10	4.46749567906814E-12	O	O06
GO:0035239	tube morphogenesis	133	8300	1.39379379805268E-14	3.58762882381643E-16	111	2024	1.5210117537516E-11	3.22994773962694E-13	O	O06
GO:0048598	embryonic morphogenesis	159	10981	2.40726820103724E-14	6.351222409429E-16	125	2723	3.2144353778659E-08	1.26177965283024E-09	O	O06
GO:0048729	tissue morphogenesis	176	12726	2.63142852845848E-14	7.11196899583374E-16	144	3131	1.26594974212529E-09	4.0731973684855E-11	O	O06
GO:0007420	brain development	154	10418	3.13457064136495E-14	8.67352236671125E-16	122	2595	1.31863330328107E-08	4.92153999937594E-10	O	O06
GO:0019827	stem cell population maintenance	56	2308	4.67183656026894E-13	1.41297502144556E-14	48	526	8.89135239960787E-12	1.77369320712898E-13	O	O06
GO:0009791	post-embryonic development	127	8705	2.30131123073601E-12	7.25638676358201E-14	109	2084	3.83165425796412E-10	1.06023895168891E-11	O	O06
GO:0021915	neural tube development	64	3119	3.5164559276537E-11	1.22193449223487E-12	48	758	0.000000912	4.28401769056204E-08	O	O06
GO:0007423	sensory organ development	142	10439	3.88821153184802E-11	1.37613664254595E-12	120	2627	8.95968265464634E-08	3.920581856602E-09	O	O06
GO:0048736	appendage development	79	4667	0.000000001	3.68743272218281E-11	70	1131	2.27359354630882E-09	7.75421222357578E-11	O	O06
GO:0048569	post-embryonic organ development	64	3500	1.83512103504646E-09	7.55777002850537E-11	58	816	6.64511008322511E-10	1.88149835046271E-11	O	O06
GO:0030900	forebrain development	92	6004	2.15014588551083E-09	8.99353169615213E-11	69	1496	0.0001261607	8.60555802746443E-06	O	O06
GO:0035107	appendage morphogenesis	73	4344	5.26726445527808E-09	2.35231567059612E-10	67	1038	1.07689560181419E-09	3.39561676247718E-11	O	O06
GO:0007444	imaginal disc development	55	2869	8.7752503009112E-09	4.12222182732637E-10	50	650	0.000000001	3.12727796944007E-11	O	O06
GO:0009886	post-embryonic morphogenesis	51	2592	0.00000002	0.000000001	46	598	5.39168228555527E-09	1.97764408157433E-10	O	O06
GO:0048568	embryonic organ development	109	8091	3.06850878001204E-08	1.55992402587485E-09	93	2045	7.1140642452533E-06	3.66232393578033E-07	O	O06
GO:0008587	imaginal disc-derived wing margin morphogenesis	18	425	0.000000111	5.93042078475261E-09	16	72	1.88118256642556E-09	6.2948193985926E-11	O	O06
GO:0002520	immune system development	126	10424	1.151724687629E-07	6.22553885204867E-09	106	2557	6.08423332606013E-05	3.99349165396042E-06	O	O06
GO:0001756	somitogenesis	33	1464	5.59093772304991E-07	3.34592798097581E-08	29	381	1.08275637483623E-05	0.000000576	O	O06
GO:0030902	hindbrain development	52	3115	1.12741872196744E-06	6.96474886157492E-08	36	730	0.0040357027	0.0003843526	O	O06
GO:0048608	reproductive structure development	105	8607	1.7103393470209E-06	0.000000109	89	2183	0.000626495	4.8781143003156E-05	O	O06
GO:0001704	formation of primary germ layer	35	1762	0.000004107	2.64286188658371E-07	26	455	0.0030943298	0.0002827509	O	O06
GO:0007507	heart development	111	9216	4.48332932687341E-06	2.94272581300572E-07	95	2163	2.16302647579144E-05	1.25271803617265E-06	O	O06
GO:0048534	hematopoietic or lymphoid organ development	115	10083	1.05039007780736E-05	7.16903541840819E-07	99	2479	0.0005092363	3.93232687055303E-05	O	O06
GO:0048565	digestive tract development	43	2533	1.14251926124085E-05	8.01380949004199E-07	36	691	0.001579609	0.0001351918	O	O06
GO:0048732	gland development	87	6893	1.52764015380933E-05	1.09117153843524E-06	72	1770	0.0031421013	0.000289138	O	O06
GO:0035148	tube formation	45	2738	3.57919317984926E-05	2.62566295046857E-06	36	660	0.0006836539	5.41116050584138E-05	O	O06
GO:0035265	organ growth	39	2552	0.0002973653	0.000026407	34	640	0.00166031	0.000143167	O	O06
GO:0035264	multicellular organism growth	45	3085	0.0003285513	2.95992121534623E-05	37	755	0.0038149422	0.0003608729	O	O06
GO:0042303	molting cycle	33	2019	0.0003288117	3.00458536358722E-05	30	539	0.0017956121	0.0001571449	O	O06
GO:0001568	blood vessel development	95	8483	0.0005401547	5.21384860478244E-05	86	2126	0.0010708931	8.68291670445817E-05	O	O06
GO:0001822	kidney development	55	4186	0.0006782864	6.72175688819311E-05	51	1102	0.0014752577	0.0001234128	O	O06
GO:0003149	membranous septum morphogenesis	8	204	0.0018842846	0.0002061315	6	40	0.0066295319	0.0006484484	O	O06
GO:0060324	face development	19	952	0.0019515391	0.0002147447	15	200	0.0037680717	0.0003531874	O	O06
GO:0003408	optic cup formation involved in camera-type eye development	5	83	0.0028990267	0.0003413912	4	11	0.001687939	0.0001466356	O	O06
GO:0048514	blood vessel morphogenesis	78	7346	0.0093274205	0.0012904732	74	1860	0.0047212356	0.0004526796	O	O06
GO:0060742	epithelial cell differentiation involved in prostate gland development	7	220	0.0097465998	0.0013798275	7	48	0.0030520472	0.0002769232	O	O06
GO:0009653	anatomical structure morphogenesis	409	37101	1.81823287250636E-18	2.94204853973843E-20	349	9062	2.88989476260928E-15	2.78947370908232E-17	O	O07
GO:0009888	tissue development	286	25791	3.35438710879533E-12	1.07927513153003E-13	238	6429	2.19527287002887E-07	0.00000001	O	O07
GO:0048646	anatomical structure formation involved in morphogenesis	203	16320	4.82719999732592E-12	1.61527927838448E-13	171	4001	3.68582208492734E-09	1.30450588591379E-10	O	O07
GO:0007548	sex differentiation	68	5249	5.34344466880145E-05	4.02305679697406E-06	60	1363	0.0014827848	0.000125025	O	O07
GO:0048869	cellular developmental process	447	43485	1.2762030433115E-15	2.95645492659034E-17	385	10811	4.00486843830426E-12	7.73140625155262E-14	O	O08
GO:0048468	cell development	321	29618	4.82719999732592E-12	1.60469994116667E-13	263	7197	0.000000073	3.14658354871899E-09	O	O08
GO:0007049	cell cycle	219	19194	1.16798852534621E-10	4.20896765890525E-12	189	4583	5.27465079569378E-09	1.90077506151127E-10	O	O08
GO:0032989	cellular component morphogenesis	242	21481	2.06241582574107E-10	7.56484569287264E-12	200	5096	0.000000073	3.13286490084133E-09	O	O08
GO:0007059	chromosome segregation	49	2311	2.42620809887361E-09	1.03043587210848E-10	45	552	1.44328213598695E-09	4.73664021462899E-11	O	O08
GO:0051301	cell division	108	7748	2.63578732137544E-09	1.13640766108208E-10	99	1839	7.62795730804261E-10	2.22913464816258E-11	O	O08
GO:0022402	cell cycle process	173	15127	2.29033647819765E-08	1.14958973809148E-09	154	3604	3.87833139195417E-08	1.57229651025169E-09	O	O08
GO:0006928	movement of cell or subcellular component	233	21878	9.83571723969941E-08	5.19001810589029E-09	197	5366	1.35096599029971E-05	7.476388363306E-07	O	O08
GO:0098813	nuclear chromosome segregation	35	1540	3.78567339604064E-07	2.16811410712752E-08	33	370	4.91243309076727E-08	2.05475000579069E-09	O	O08
GO:0008219	cell death	228	22613	5.15903160261161E-07	3.05425294363107E-08	204	5729	5.98914521119555E-05	3.8154786094489E-06	O	O08
GO:1903047	mitotic cell cycle process	116	9684	8.14668304526182E-07	4.98027599292067E-08	98	2264	2.63071497143707E-05	1.57436610259747E-06	O	O08
GO:0016477	cell migration	158	14881	7.33997176261868E-05	5.62069909750079E-06	141	3720	0.0001468403	1.01106277947522E-05	O	O08
GO:0051321	meiotic cell cycle	45	2955	7.95863150539622E-05	6.14566139412835E-06	42	704	2.439872662913E-05	1.44445485835261E-06	O	O08
GO:0008037	cell recognition	38	2266	9.81176841456606E-05	7.63979393926959E-06	30	497	0.0004818121	3.68955245802215E-05	O	O08
GO:0022412	cellular process involved in reproduction in multicellular organism	78	6406	0.0001665167	1.33942040502567E-05	70	1441	2.1524678310357E-05	1.23275184660346E-06	O	O08
GO:0048870	cell motility	161	15478	0.0001926846	1.58710629567072E-05	144	3890	0.0003623038	2.68114162294001E-05	O	O08
GO:0016358	dendrite development	66	5049	0.0002920245	0.000025181	54	1092	0.0001900307	1.32067652087271E-05	O	O08
GO:0051304	chromosome separation	15	563	0.0002938768	2.55298390788696E-05	12	136	0.0033873657	0.0003138872	O	O08
GO:0048588	developmental cell growth	41	2680	0.0003351837	3.0843799093157E-05	32	601	0.0023923887	0.000213991	O	O08
GO:0007281	germ cell development	68	5540	0.0004189962	3.90955313519014E-05	61	1238	6.08423332606013E-05	3.99517823228431E-06	O	O08
GO:1903046	meiotic cell cycle process	40	2708	0.0004254257	3.99692127025775E-05	38	653	0.0001198013	8.09468114432783E-06	O	O08
GO:0000910	cytokinesis	43	3030	0.0004674766	4.4521582098758E-05	40	721	0.0002022274	1.4314677323137E-05	O	O08
GO:0060184	cell cycle switching	8	236	0.0017699265	0.0001879266	6	41	0.0073970165	0.0007425576	O	O08
GO:0045610	regulation of hemocyte differentiation	7	167	0.0020861558	0.0002322426	6	42	0.0083824821	0.0008468788	O	O08
GO:0071495	cellular response to endogenous stimulus	154	12570	5.26726445527808E-09	2.37264164652166E-10	130	3200	1.35079201570834E-05	7.3885020164227E-07	O	O09
GO:0071774	response to fibroblast growth factor	52	2820	4.52353444943613E-08	2.32871786328759E-09	39	719	0.0004004507	3.01497620519612E-05	O	O09
GO:0042330	taxis	124	9961	0.000000293	1.65925670561379E-08	96	2368	0.0003951892	2.94993210924668E-05	O	O09
GO:0071772	response to BMP	40	2033	4.82564379614767E-07	2.82582744819458E-08	31	545	0.0010319952	8.30111999693028E-05	O	O09
GO:0006935	chemotaxis	119	9594	5.60152367165873E-07	3.38830904205869E-08	93	2287	0.0004692236	3.56295940285645E-05	O	O09
GO:0070887	cellular response to chemical stimulus	232	23462	4.29814270382498E-06	2.79351617172666E-07	207	6070	0.0006959461	5.55323764923715E-05	O	O09
GO:0071559	response to transforming growth factor beta	42	3168	0.0022733753	0.0002574737	39	760	0.0012081921	0.000098739	O	O09
GO:0044702	single organism reproductive process	184	16212	1.81217333128925E-08	8.74601028614501E-10	163	3972	1.83068110111242E-07	8.24631126627215E-09	O	O10
GO:0007276	gamete generation	104	9300	0.0002973653	2.62567739142419E-05	95	2141	1.41854378301797E-05	8.03293776741194E-07	O	O10
GO:0048609	multicellular organismal reproductive process	122	11787	0.0014423717	0.0001485067	111	2804	0.000250346	0.000018043	O	O10
GO:0044703	multi-organism reproductive process	131	12973	0.0018165799	0.0001972874	120	3081	0.0002277261	1.62661479760795E-05	O	O10
GO:0044091	membrane biogenesis	19	736	4.28731227209275E-05	3.17272143687688E-06	13	121	0.0003172885	0.000023276	O	O11
GO:0044087	regulation of cellular component biogenesis	80	7371	0.004586172	0.0005695825	69	1749	0.0086475286	0.0008847857	O	O11
GO:0045475	locomotor rhythm	8	252	0.0049975803	0.0006399733	7	54	0.0059658248	0.0005796908	O	O12
GO:1902589	single-organism organelle organization	467	25107	5.24204406929233E-29	6.64029395471149E-32	357	5834	2.49324447653195E-36	3.20880885010547E-39	P	P01
GO:0006996	organelle organization	564	32726	5.24204406929233E-29	6.74651746369669E-32	434	7756	1.35197339129226E-37	8.69995747292315E-41	P	P01
GO:0043933	macromolecular complex subunit organization	416	24414	4.81596298390668E-20	9.29722583765768E-23	321	5887	6.14213728878019E-22	1.1857407893398E-24	P	P01
GO:0045478	fusome organization	22	173	2.83075086985256E-14	7.2863600253605E-17	10	26	1.44910487709253E-07	4.28949963618124E-09	P	P01
GO:0051128	regulation of cellular component organization	349	24417	0.000001557	6.91352820453482E-08	284	5798	3.18766752033908E-12	1.43588627042301E-14	P	P01
GO:0022607	cellular component assembly	333	23593	4.48768674538699E-06	2.28138515370381E-07	260	5731	5.84757664398076E-08	1.61805531332801E-09	P	P01
GO:0022411	cellular component disassembly	92	5085	5.28667243998567E-05	3.02775963422603E-06	61	1168	0.0027063646	0.0002142103	P	P01
GO:0007051	spindle organization	52	2381	0.0001428586	8.91716852596138E-06	39	536	5.97251579749923E-05	3.0612242862365E-06	P	P01
GO:0061024	membrane organization	154	10284	0.0008312769	0.000065796	113	2471	0.0019561552	0.0001422429	P	P01
GO:0010256	endomembrane system organization	99	5885	0.0020414817	0.0001888475	72	1282	9.85101308083821E-05	5.32487193558822E-06	P	P01
GO:0030030	cell projection organization	270	19211	0.0034206035	0.0003323752	197	4564	0.0001863475	0.000011272	P	P01
GO:0051129	negative regulation of cellular component organization	107	6897	0.0037437382	0.0003684414	83	1638	0.0006822386	4.47801416570247E-05	P	P01
GO:0043062	extracellular structure organization	71	4257	0.0079999059	0.000839115	59	1002	0.0001635263	9.78632301529611E-06	P	P01
GO:0034330	cell junction organization	71	4113	0.0095704771	0.001022329	58	978	0.0001595373	9.44493662054531E-06	P	P01
GO:0007049	cell cycle	324	19194	9.88766577423185E-14	3.18135964421874E-16	243	4583	1.37884217309032E-13	4.43642912834723E-16	P	P02
GO:0007017	microtubule-based process	167	7557	7.08663708488065E-13	2.73615331462573E-15	119	1736	1.93476870753915E-12	7.47014944995811E-15	P	P02
GO:0007166	cell surface receptor signaling pathway	383	24971	3.12761028277461E-10	2.6164049984601E-12	292	6052	6.58001634511268E-12	3.38739580185981E-14	P	P02
GO:0016458	gene silencing	79	2966	1.23713406229137E-09	1.3533641608078E-11	50	570	1.27044801991946E-08	2.77961600239778E-10	P	P02
GO:0022402	cell cycle process	250	15127	2.61123350603402E-09	3.36066088292667E-11	188	3604	9.13931584626172E-10	1.52910046333851E-11	P	P02
GO:0022412	cellular process involved in reproduction in multicellular organism	123	6406	7.30603883624786E-08	2.06863390472912E-09	95	1441	2.55271890612354E-09	4.76376115042359E-11	P	P02
GO:0030522	intracellular receptor signaling pathway	72	3392	0.000000913	3.64243125647422E-08	50	812	0.0002384017	1.47275206563429E-05	P	P02
GO:0030029	actin filament-based process	163	9761	0.000001557	0.000000069	127	2269	3.94922546607635E-08	0.000000001	P	P02
GO:0007163	establishment or maintenance of cell polarity	85	3991	4.24964559523806E-06	2.13302674664459E-07	65	881	3.56742057990941E-08	8.72342226747475E-10	P	P02
GO:0010646	regulation of cell communication	386	28504	0.000265462	1.77657970816426E-05	298	7158	9.86125921734209E-06	4.25163685689781E-07	P	P02
GO:0009966	regulation of signal transduction	340	24737	0.0003157218	2.15357220009199E-05	272	6153	0.000000249	7.53027064930947E-09	P	P02
GO:0007165	signal transduction	539	42185	0.0004374072	3.12433721508587E-05	424	10776	3.65426272779958E-06	1.38739704594707E-07	P	P02
GO:1903047	mitotic cell cycle process	147	9684	0.0011453073	9.72847910366789E-05	116	2264	1.50956936383035E-05	6.70272111353245E-07	P	P02
GO:0008219	cell death	289	22613	0.0037589532	0.0003725089	231	5729	0.0020904497	0.0001547624	P	P02
GO:0051172	negative regulation of nitrogen compound metabolic process	278	16273	6.34049984432113E-12	2.85608101095546E-14	205	3941	1.52788998404698E-10	1.61154073271183E-12	P	P03
GO:0051171	regulation of nitrogen compound metabolic process	476	33779	3.12761028277461E-10	2.54668275993556E-12	374	8446	4.32249719854043E-11	2.7815297287905E-13	P	P03
GO:0009890	negative regulation of biosynthetic process	269	16351	5.27715633200641E-10	4.75419489369947E-12	198	3996	1.51334732401656E-08	3.40843991895621E-10	P	P03
GO:0009892	negative regulation of metabolic process	373	24824	0.000000001	1.04768104289497E-11	289	6165	1.6750234733865E-10	1.94018162940521E-12	P	P03
GO:0009889	regulation of biosynthetic process	463	33055	1.45982656861053E-09	1.69091880534038E-11	364	8270	1.7245796263537E-10	2.10855938872074E-12	P	P03
GO:0051173	positive regulation of nitrogen compound metabolic process	291	19056	5.94148727441351E-09	9.77734870404232E-11	228	4647	1.1550982505677E-09	2.08125810913099E-11	P	P03
GO:0048523	negative regulation of cellular process	556	40881	0.000000009	1.61413402663374E-10	436	10296	5.80692210013759E-11	4.88127121993365E-13	P	P03
GO:0080090	regulation of primary metabolic process	576	43304	1.17355737632641E-08	2.49211025860821E-10	458	10953	5.77724228339475E-11	4.46119095242838E-13	P	P03
GO:0048519	negative regulation of biological process	585	43884	2.43528480488731E-08	5.48487568668314E-10	458	11109	4.27434475266735E-10	6.05119591754709E-12	P	P03
GO:0009891	positive regulation of biosynthetic process	272	18605	6.19109328152203E-07	2.31070405616652E-08	219	4569	2.38384449704802E-08	5.52241968428112E-10	P	P03
GO:0048522	positive regulation of cellular process	556	42418	1.19370650716172E-06	4.99298088581158E-08	437	10712	0.000000012	2.53942221178652E-10	P	P03
GO:0019222	regulation of metabolic process	617	48651	3.258084528005E-06	1.55146882285952E-07	498	12301	2.57552910853791E-10	3.31470927739756E-12	P	P03
GO:0050794	regulation of cellular process	838	69476	0.0002184253	1.41962397867769E-05	672	18005	1.52788998404698E-10	1.67143691948511E-12	P	P03
GO:0023051	regulation of signaling	382	28279	0.0003398577	2.3400755990703E-05	297	7119	8.69489563981734E-06	3.69281281999964E-07	P	P03
GO:0050793	regulation of developmental process	361	27085	0.000423843	0.000029729	265	6774	0.0037165397	0.0003109074	P	P03
GO:0048518	positive regulation of biological process	592	47613	0.0008529243	6.83063300639655E-05	469	12136	3.25174727038344E-06	1.19272583276613E-07	P	P03
GO:0048583	regulation of response to stimulus	401	30761	0.0010468392	8.64485218866672E-05	315	7799	5.97251579749923E-05	2.93664186755937E-06	P	P03
GO:0009653	anatomical structure morphogenesis	545	37101	1.48794490430301E-11	7.65994802729994E-14	417	9062	3.46578153725052E-16	8.92093059781344E-19	P	P04
GO:0021692	cerebellar Purkinje cell layer morphogenesis	26	412	2.85350671712724E-10	1.85006350844417E-12	11	95	0.0033511655	0.0002695596	P	P04
GO:0009887	organ morphogenesis	280	17047	1.82138091227468E-09	2.22691359930624E-11	216	4191	8.06403443534512E-11	7.7838170225339E-13	P	P04
GO:0007423	sensory organ development	185	10439	4.91513358202971E-09	6.64207240814826E-11	133	2627	4.4306660517802E-06	1.71068187327421E-07	P	P04
GO:0021680	cerebellar Purkinje cell layer development	29	626	5.94148727441351E-09	9.94071229953355E-11	15	134	0.0005150868	3.3145867149672E-05	P	P04
GO:0048869	cellular developmental process	596	43485	6.48246086818219E-09	1.12629628983861E-10	453	10811	5.80692210013759E-11	5.23146135147531E-13	P	P04
GO:0048513	organ development	535	38874	1.17355737632641E-08	2.46676710540518E-10	411	9859	0.000000004	7.98088231670154E-11	P	P04
GO:0048736	appendage development	102	4667	3.18604678540213E-08	7.79084799519182E-10	72	1131	1.54092599515667E-06	5.15625172124499E-08	P	P04
GO:0007389	pattern specification process	168	9476	4.50515320982554E-08	1.13063690594077E-09	125	2399	2.52976609673729E-06	9.11627422247672E-08	P	P04
GO:0035107	appendage morphogenesis	96	4344	0.000000052	1.43957692206311E-09	66	1038	0.000005083	1.99524968461738E-07	P	P04
GO:0009888	tissue development	374	25791	0.000000083	2.40309520178946E-09	295	6429	8.28160903681892E-10	1.33230518610343E-11	P	P04
GO:0048731	system development	661	50262	8.72623846536134E-08	2.58305643118804E-09	507	12765	3.07282054346871E-09	5.93208599125233E-11	P	P04
GO:0048569	post-embryonic organ development	80	3500	1.37791171561165E-07	4.27463931002842E-09	55	816	8.45507037672536E-06	3.5365480983729E-07	P	P04
GO:0007275	multicellular organismal development	719	55719	1.37791171561165E-07	4.34476667084753E-09	562	14166	3.74424903713492E-11	2.16848399834069E-13	P	P04
GO:0048568	embryonic organ development	144	8091	1.64491391673352E-07	5.29251581960593E-09	107	2045	1.62231348633785E-05	7.30771840692725E-07	P	P04
GO:0007444	imaginal disc development	70	2869	1.99383629731097E-07	6.67178168984366E-09	46	650	1.87743518319051E-05	8.69854138929967E-07	P	P04
GO:0009886	post-embryonic morphogenesis	65	2592	4.52264947807081E-07	0.000000016	41	598	0.0001300635	7.36524575255393E-06	P	P04
GO:0021695	cerebellar cortex development	32	893	5.51224067564208E-07	2.02186434048648E-08	17	202	0.0042363168	0.0003598416	P	P04
GO:0021587	cerebellum morphogenesis	31	806	7.03529760712087E-07	2.71633112244049E-08	17	189	0.0021550573	0.0001636401	P	P04
GO:0021575	hindbrain morphogenesis	33	956	0.000001426	6.05620690181438E-08	19	242	0.004693092	0.000401661	P	P04
GO:0048598	embryonic morphogenesis	181	10981	1.52632389380208E-06	6.58067573260871E-08	141	2723	5.31126964695088E-07	1.67472466345298E-08	P	P04
GO:0007281	germ cell development	104	5540	2.40759397693385E-06	1.11548755688055E-07	82	1238	3.65609915706978E-08	9.17553842507859E-10	P	P04
GO:0008587	imaginal disc-derived wing margin morphogenesis	21	425	3.11276114460399E-06	1.46223657372002E-07	9	72	0.006158227	0.0005435822	P	P04
GO:0009791	post-embryonic development	144	8705	3.51279488355367E-06	1.71796918371994E-07	106	2084	5.97251579749923E-05	3.02235999774431E-06	P	P04
GO:0007293	germarium-derived egg chamber formation	23	511	3.55177715396924E-06	0.000000176	16	104	6.42118016093549E-06	2.6031811463252E-07	P	P04
GO:0001756	somitogenesis	38	1464	2.72644761429077E-05	1.49130017512687E-06	28	381	0.0009277622	6.20896184943617E-05	P	P04
GO:0035295	tube development	183	11627	4.15648624969852E-05	2.30024335568901E-06	147	2929	1.65581782871793E-06	5.64725514298909E-08	P	P04
GO:0022037	metencephalon development	47	1942	4.29859021309378E-05	2.43420810007884E-06	30	441	0.0019561552	0.000138375	P	P04
GO:0021549	cerebellum development	43	1729	5.94907594626432E-05	3.44541077968976E-06	27	379	0.0019561552	0.000139578	P	P04
GO:0035148	tube formation	59	2738	9.26108327048695E-05	5.66153739186783E-06	44	660	0.0001247841	0.000006986	P	P04
GO:0048729	tissue morphogenesis	194	12726	0.0001789783	1.12869192439387E-05	162	3131	4.11484184146755E-08	1.11211941661285E-09	P	P04
GO:0035239	tube morphogenesis	137	8300	0.0001831287	1.16665006058777E-05	110	2024	2.12043331850252E-06	0.000000075	P	P04
GO:0021915	neural tube development	63	3119	0.0002056069	1.32308171253736E-05	49	758	9.35051878882429E-05	0.000004934	P	P04
GO:0048646	anatomical structure formation involved in morphogenesis	239	16320	0.0002476043	1.64113538390598E-05	189	4001	1.27994273288142E-06	4.11821986126583E-08	P	P04
GO:0032989	cellular component morphogenesis	304	21481	0.0002913046	1.968274598547E-05	223	5096	1.73587329277165E-05	7.93095262463238E-07	P	P04
GO:0030902	hindbrain development	60	3115	0.0005682659	4.16874579742901E-05	42	730	0.0036731536	0.0003025506	P	P04
GO:0048468	cell development	400	29618	0.0005741314	4.24872042377841E-05	309	7197	2.62860613795356E-07	8.1192467581577E-09	P	P04
GO:0007349	cellularization	19	568	0.0006016335	4.52967331409126E-05	14	132	0.0015587301	0.0001083287	P	P04
GO:0002520	immune system development	150	10424	0.0007875999	6.13253448151778E-05	116	2557	0.0021039799	0.0001584078	P	P04
GO:0048534	hematopoietic or lymphoid organ development	145	10083	0.0010468392	8.68997762883381E-05	112	2479	0.0030541114	0.0002437	P	P04
GO:0048364	root development	19	598	0.0020414817	0.0001891721	12	116	0.0048071104	0.0004151854	P	P04
GO:0007507	heart development	141	9216	0.0023383983	0.0002196951	108	2163	0.0001008133	5.53518128489019E-06	P	P04
GO:0019827	stem cell population maintenance	45	2308	0.0027156032	0.0002568814	36	526	0.0004278272	2.72554006150092E-05	P	P04
GO:0021678	third ventricle development	8	184	0.0034002868	0.000328213	6	26	0.0020904497	0.0001560439	P	P04
GO:0021592	fourth ventricle development	8	198	0.0057052588	0.0005800714	6	33	0.006811639	0.0006180445	P	P04
GO:0010228	vegetative to reproductive phase transition of meristem	11	319	0.0095704771	0.0010203611	8	62	0.0094881621	0.0008853176	P	P04
GO:0006482	protein demethylation	26	409	3.99291276835262E-11	2.31249774228916E-13	18	81	4.71691942364316E-09	9.71309019025619E-11	P	P05
GO:0031324	negative regulation of cellular metabolic process	339	22574	9.09890792717724E-09	1.69799440082458E-10	263	5566	9.28090337870888E-10	1.61251217004594E-11	P	P05
GO:0046483	heterocycle metabolic process	544	41174	1.07022246089088E-08	2.06606652681637E-10	421	10675	3.25726835874819E-06	1.21571148524707E-07	P	P05
GO:0006725	cellular aromatic compound metabolic process	543	41299	2.43528480488731E-08	5.39332959050888E-10	420	10748	9.94019364835695E-06	0.000000435	P	P05
GO:0031323	regulation of cellular metabolic process	583	44337	0.000000048	1.29747271065508E-09	466	11186	5.31162404514664E-11	3.75983684019389E-13	P	P05
GO:0006139	nucleobase-containing compound metabolic process	522	39987	1.37791171561165E-07	4.19425693533307E-09	412	10355	0.00000186	6.4632657968433E-08	P	P05
GO:0034641	cellular nitrogen compound metabolic process	565	44188	2.36209195305051E-07	8.0560407665172E-09	440	11579	0.0001008133	5.57911602508126E-06	P	P05
GO:0044249	cellular biosynthetic process	541	41892	3.44334901837586E-07	0.000000012	416	10844	9.8071657006466E-05	5.23806147460533E-06	P	P05
GO:0044260	cellular macromolecule metabolic process	698	55887	0.00000083	3.25820181811585E-08	562	14414	8.17805226400848E-10	1.26301965467312E-11	P	P05
GO:0043414	macromolecule methylation	54	2592	0.0008041459	6.31311491871E-05	43	569	8.45507037672536E-06	3.49235340014352E-07	P	P05
GO:0031325	positive regulation of cellular metabolic process	355	27287	0.0008529243	6.86071637229577E-05	284	6839	2.58478656765498E-05	1.24748386469835E-06	P	P05
GO:0045185	maintenance of protein location	52	1404	2.85350671712724E-10	2.01985674957527E-12	23	306	0.0025320214	0.0001971522	P	P06
GO:0051651	maintenance of location in cell	51	1407	6.59149431198139E-10	6.36244624708629E-12	22	296	0.0037280989	0.0003142735	P	P06
GO:0070727	cellular macromolecule localization	211	14172	6.59791210920024E-05	3.86364222610825E-06	158	3438	7.31942563172552E-05	3.81514463429708E-06	P	P06
GO:0046907	intracellular transport	239	16742	8.62285385764324E-05	5.2158832858331E-06	185	4208	0.0001326959	7.59970087415715E-06	P	P06
GO:1902580	single-organism cellular localization	190	12793	0.000739773	5.71253299825959E-05	137	3041	0.0007650665	0.000050709	P	P06
GO:0051649	establishment of localization in cell	312	23652	0.0022567058	0.0002105678	243	6087	0.0023562799	0.0001819521	P	P06
GO:0051656	establishment of organelle localization	79	4663	0.0052920212	0.0005312454	56	1080	0.0052534305	0.0004597597	P	P06
GO:0008104	protein localization	277	20973	0.0094294723	0.0009951309	213	5247	0.0027063646	0.0002136235	P	P06
GO:0070988	demethylation	28	589	5.94148727441351E-09	9.54392120621575E-11	19	130	1.42920588763584E-06	4.69044403278172E-08	P	P07
GO:1901360	organic cyclic compound metabolic process	552	42303	4.61227973873544E-08	1.18824372393663E-09	428	11076	2.51911995768157E-05	1.19958093222932E-06	P	P07
GO:1901576	organic substance biosynthetic process	542	42311	9.54702882636723E-07	3.8704170917705E-08	418	10947	0.0001412705	8.27259559360141E-06	P	P07
GO:0043170	macromolecule metabolic process	728	59179	5.31044523654518E-06	2.7338199415934E-07	593	15366	3.48838762756747E-10	4.71403733455063E-12	P	P07
GO:0019538	protein metabolic process	513	39601	1.911915019096E-05	1.03346757788973E-06	414	10097	3.26306380402548E-08	7.769199533394E-10	P	P07
GO:0007276	gamete generation	169	9300	1.17355737632641E-08	2.46232988055467E-10	128	2141	7.96227043003093E-10	1.17845701345374E-11	P	P08
GO:0044702	single organism reproductive process	255	16212	4.61227973873544E-08	1.21688204175131E-09	195	3972	4.01541823239355E-08	1.05940892875248E-09	P	P08
GO:0044703	multi-organism reproductive process	208	12973	4.5961231597114E-07	1.6562605980942E-08	159	3081	0.000000069	0.000000002	P	P08
GO:0048609	multicellular organismal reproductive process	190	11787	1.64682196365318E-06	7.41811695339271E-08	148	2804	6.62102711202382E-08	1.87467949117792E-09	P	P08
GO:0051701	interaction with host	68	3006	2.83283397721765E-08	6.56254975417215E-10	44	691	0.0003455542	2.15693394699969E-05	P	P09
GO:0051817	modification of morphology or physiology of other organism involved in symbiotic interaction	68	3018	3.05837871376159E-08	7.28185408038473E-10	45	660	5.97251579749923E-05	3.07465420720681E-06	P	P09
GO:0002504	antigen processing and presentation of peptide or polysaccharide antigen via MHC class II	33	1054	6.54272327422071E-07	2.48404551595252E-08	19	236	0.0035890973	0.0002933175	P	P10
GO:0019884	antigen processing and presentation of exogenous antigen	37	1400	3.43981660064325E-06	0.000000166	24	359	0.008670077	0.0007922464	P	P10
GO:0071559	response to transforming growth factor beta	68	3168	2.06735887135667E-06	9.44546202485996E-08	51	760	2.29901412579734E-05	0.00000108	P	P11
GO:0071772	response to BMP	49	2033	5.59585684700882E-06	2.91675936041E-07	33	545	0.006158227	0.0005468696	P	P11
GO:0071495	cellular response to endogenous stimulus	180	12570	0.0014170352	0.0001231015	142	3200	0.001097124	0.00007413	P	P11
GO:0044087	regulation of cellular component biogenesis	128	7371	7.346684788338E-06	3.87662903889135E-07	90	1749	0.0001909631	1.1674061649495E-05	P	P12
GO:0070271	protein complex biogenesis	175	12526	0.0037437382	0.000368592	138	3105	0.0013041549	8.89578018833511E-05	P	P12
GO:0022609	multicellular organism adhesion to substrate	5	53	0.0007228223	5.53512607328455E-05	5	6	5.35275964572905E-06	2.13559265144917E-07	P	P13
