# Supplementary material for: Differential gene expression during early development in recently evolved and sympatric Arctic charr morphs
Source: PeerJ. 2018 Feb 7;6:e4345. doi: 10.7717/peerj.4345 (PMC5807978; doi:10.7717/peerj.4345)
Supplement: Table S4 — Gene Symbol: The symbol or short gene name used in figures and text Description: Full name of each gene Forward primer:Sequence for the forward qPCR primer in 5’-3’ orientation Reverse primer: Sequence for the reverse qPCR primer in 5’-3’ orientation Amplicon size: Size of the sequence amplified in the qPCR reaction Transcripts: The id of assembled transcripts in the transciptome that the primers bind to and were used for comparison of expression. If there are more than one transcipts for each gene the ids are separated by a semicolon. [file peerj-06-4345-s004.csv]

Gene Symbol	Description	Forward primer	Reverse primer	Amplicon size	Transcripts
Arid4a	AT-rich interactive domain-containing protein 4A	CATGACAAGTGCTGAGAGGAT	CTGTGGTGTGGGACACTTC	149	TRINITY_DN167359_c3_g1_i1;TRINITY_DN167359_c3_g1_i2
Des2	Sphingolipid delta(4)-desaturase/C4-hydroxylase DES2	GGAAGGTGCGTTTAATTCTGGAG	CTGTAGTCGGAGGAAGCAGAT	150	TRINITY_DN153141_c1_g2_i3
Eif4ebp1	Eukaryotic translation initiation factor 4E-binding protein 1	GAATGCTCATTCCACCAACAGT	GAGCCACTGAACAACAACATC	99	TRINITY_DN152775_c3_g1_i1;TRINITY_DN152775_c3_g1_i2
Gpi	Glucose-6-phosphate isomerase	GACGTACTGATGTGGTGTCAG	GTGAGGTTCATGGGCTTGTAG	106	TRINITY_DN171693_c0_g1_i1;TRINITY_DN171693_c0_g1_i3
Mamdc2	MAM domain-containing protein 2	GTCCTCTGCTCCTTCACTCAA	GATGACATTGTGTTTGAAAGTGGAC	100	TRINITY_DN133828_c0_g1_i1
Prc1	Protein regulator of cytokinesis 1	TGACATGATCACTGAGGAGGAAG	TCTCAATCTGGAGGACTGTCAG	146	TRINITY_DN170272_c7_g1_i6;TRINITY_DN170272_c7_g1_i7;TRINITY_DN170272_c7_g1_i10
Tsn	Translin	TCGTGGTCTACCTGGAGAGT	AGGCGAGACAGTTCACTGG	151	TRINITY_DN164434_c1_g1_i1;TRINITY_DN164434_c1_g1_i2;TRINITY_DN164434_c1_g1_i5
